# Supplementary material for: Synthesis, photophysical characterization, and aerobic redox reactivity of electron-rich tellurorhodamine photocatalysts
Source: Royal Society of Chemistry journal article supplement (doi:10.1039/d2dt03534k), 2023-01-01
Supplement: d2dt03534k2.pdf [file d2dt03534k2.pdf]

## Supporting Information

for

Synthesis, photophysical characterization, and aerobic redox reactivity of electron-rich tellurorhodamine photocatalysts

Irving D. Rettig, Kristine M. Halvorsen, Theresa M. McCormick\*

Department of Chemistry, Portland State University, Portland, Oregon, 97201, USA

\*t.m.mccormick@pdx.edu

### Contents

|                                                                          |     |
|--------------------------------------------------------------------------|-----|
| 1. Scheme S1 – Synthesis of <b>3</b>                                     | S3  |
| 2. Table S1 – Crystal data and structure refinement for <b>1A</b> .      | S4  |
| 3. Table S2 – Atomic coordinates for <b>1A</b> .                         | S5  |
| 4. Table S3 – Bond lengths and angles for <b>1A</b> .                    | S7  |
| 5. Table S4 – Anisotropic displacement parameters for <b>1A</b> .        | S11 |
| 6. Table S5 – Hydrogen coordinates for <b>1A</b> .                       | S13 |
| 7. Table S6 – Torsion angles for <b>1A</b> .                             | S15 |
| 8. Table S7 – Crystal data and structure refinement for <b>1B</b> .      | S16 |
| 9. Table S8 – Atomic coordinates for <b>1B</b> .                         | S17 |
| 10. Table S9 – Bond lengths and angles for <b>1B</b> .                   | S19 |
| 11. Table S10 – Anisotropic displacement parameters for <b>1B</b> .      | S22 |
| 12. Table S11 – Hydrogen coordinates for <b>1B</b> .                     | S24 |
| 13. Table S12 – Torsion angles for <b>1B</b> .                           | S26 |
| 14. Figure S1 – <sup>1</sup> H/ <sup>13</sup> C NMR spectra of <b>1A</b> | S27 |

|                                                                              |     |
|------------------------------------------------------------------------------|-----|
| 15. Figure S2 – $^1\text{H}/^{13}\text{C}$ NMR spectra of <b>1B</b>          | S28 |
| 16. Figure S3 – $^1\text{H}/^{13}\text{C}$ NMR spectra of <b>1C</b>          | S29 |
| 17. Figure S4 – $^1\text{H}/^{13}\text{C}$ NMR spectra of <b>1D</b>          | S30 |
| 18. Figure S5 – Mass spectra of <b>1A</b> and <b>2A</b>                      | S31 |
| 19. Figure S6 – Mass spectra of <b>1B</b> and <b>2B</b>                      | S32 |
| 20. Figure S7 – Mass spectra of <b>1C</b> and <b>2C</b>                      | S33 |
| 21. Figure S8 – Mass spectra of <b>1D</b> and <b>2D</b>                      | S34 |
| 22. Figure S9 – Spectrum of 24 Watt white LEDs                               | S35 |
| 23. Table S13 – Hirshfeld charges of <b>1A-2D</b> and <b>2A-2D</b>           | S35 |
| 24. Figure S10 – Pseudo first order rate plots for reduction of <b>2A-2D</b> | S36 |
| 25. Figure S11 – Eyring plots for reduction of <b>2A-2D</b>                  | S37 |
| 26. Table S14 – Calculated energies for <b>1A-1D</b> and <b>2A-2D</b>        | S38 |

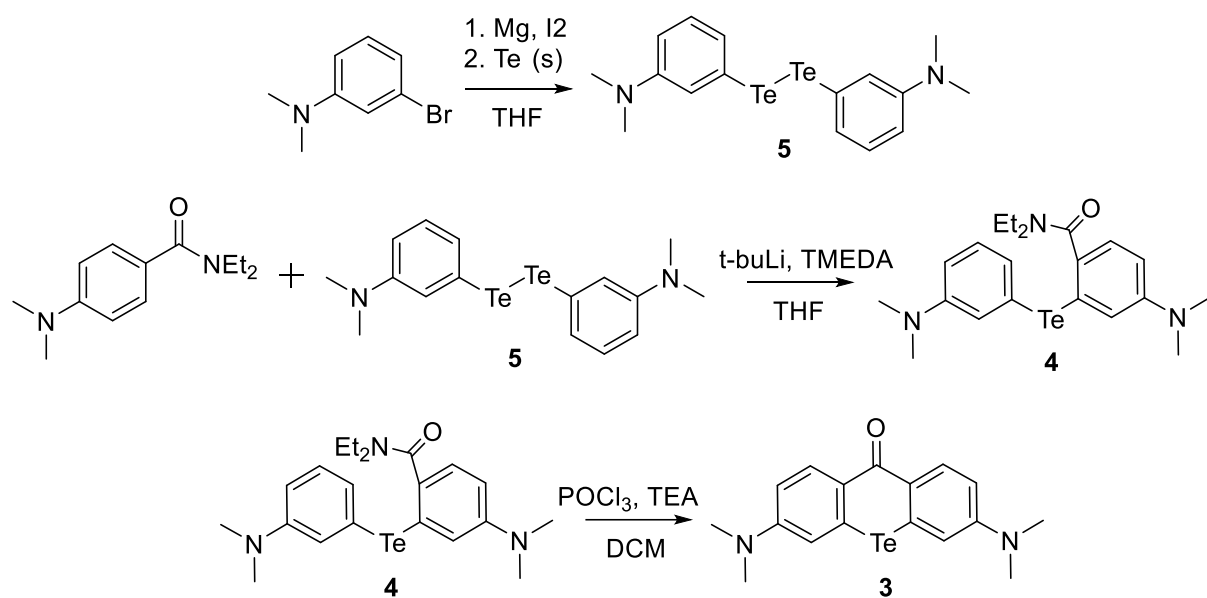

Scheme S1. Synthesis of **3** from intermediates **4** and **5** as previously described in Ref<sup>1</sup>.

Table S1. Crystal data and structure refinement for **1A**.

|                                                     |                                                                                            |                          |  |
|-----------------------------------------------------|--------------------------------------------------------------------------------------------|--------------------------|--|
| Identification code                                 | <b>1A</b>                                                                                  |                          |  |
| Empirical formula                                   | C <sub>27</sub> H <sub>31.08</sub> F <sub>6</sub> N <sub>2.46</sub> O <sub>0.27</sub> P Te |                          |  |
| Formula weight                                      | 666.95                                                                                     |                          |  |
| Temperature                                         | 100.00(10) K                                                                               |                          |  |
| Wavelength                                          | 1.54184 Å                                                                                  |                          |  |
| Crystal system                                      | triclinic                                                                                  |                          |  |
| Space group                                         | <i>P</i> -1                                                                                |                          |  |
| Unit cell dimensions                                | <i>a</i> = 7.8985(2) Å                                                                     | <i>a</i> = 115.0760(10)° |  |
|                                                     | <i>b</i> = 13.2724(2) Å                                                                    | <i>b</i> = 94.431(2)°    |  |
|                                                     | <i>c</i> = 14.3100(2) Å                                                                    | <i>g</i> = 90.9680(10)°  |  |
| Volume                                              | 1352.64(5) Å <sup>3</sup>                                                                  |                          |  |
| <i>Z</i>                                            | 2                                                                                          |                          |  |
| Density (calculated)                                | 1.638 Mg/m <sup>3</sup>                                                                    |                          |  |
| Absorption coefficient                              | 9.806 mm <sup>-1</sup>                                                                     |                          |  |
| <i>F</i> (000)                                      | 667                                                                                        |                          |  |
| Crystal color, morphology                           | dark green, plate                                                                          |                          |  |
| Crystal size                                        | 0.092 x 0.082 x 0.016 mm <sup>3</sup>                                                      |                          |  |
| Theta range for data collection                     | 3.425 to 77.739°                                                                           |                          |  |
| Index ranges                                        | -9 ≤ <i>h</i> ≤ 10, -16 ≤ <i>k</i> ≤ 16, -18 ≤ <i>l</i> ≤ 18                               |                          |  |
| Reflections collected                               | 45164                                                                                      |                          |  |
| Independent reflections                             | 5689 [ <i>R</i> (int) = 0.0758]                                                            |                          |  |
| Observed reflections                                | 5384                                                                                       |                          |  |
| Completeness to theta = 74.504°                     | 99.7%                                                                                      |                          |  |
| Absorption correction                               | Multi-scan                                                                                 |                          |  |
| Max. and min. transmission                          | 1.00000 and 0.61756                                                                        |                          |  |
| Refinement method                                   | Full-matrix least-squares on <i>F</i> <sup>2</sup>                                         |                          |  |
| Data / restraints / parameters                      | 5689 / 321 / 398                                                                           |                          |  |
| Goodness-of-fit on <i>F</i> <sup>2</sup>            | 1.115                                                                                      |                          |  |
| Final <i>R</i> indices [ <i>I</i> > 2σ( <i>I</i> )] | <i>R</i> 1 = 0.0375, <i>wR</i> 2 = 0.0984                                                  |                          |  |
| <i>R</i> indices (all data)                         | <i>R</i> 1 = 0.0393, <i>wR</i> 2 = 0.0999                                                  |                          |  |
| Largest diff. peak and hole                         | 1.273 and -1.041 e.Å <sup>-3</sup>                                                         |                          |  |

Table S2. Atomic coordinates ( $\times 10^4$ ) and equivalent isotropic displacement parameters ( $\text{\AA}^2 \times 10^3$ ) for **1A**.  $U_{\text{eq}}$  is defined as one third of the trace of the orthogonalized  $U_{ij}$  tensor.

|     | x       | y       | z       | $U_{\text{eq}}$ |
|-----|---------|---------|---------|-----------------|
| Te1 | 7600(1) | 4561(1) | 4003(1) | 22(1)           |
| N1  | 5573(4) | 2314(3) | -36(2)  | 30(1)           |
| N2  | 7486(4) | 5405(3) | 7979(2) | 26(1)           |
| C1  | 4390(5) | 1589(3) | 2031(3) | 26(1)           |
| C2  | 4466(5) | 1552(3) | 1069(3) | 28(1)           |
| C3  | 5467(5) | 2360(3) | 918(3)  | 26(1)           |
| C4  | 6341(4) | 3218(3) | 1814(3) | 25(1)           |
| C5  | 5339(4) | 3006(3) | 5805(3) | 26(1)           |
| C6  | 5880(4) | 3721(3) | 6795(3) | 25(1)           |
| C7  | 6947(4) | 4688(3) | 7011(3) | 24(1)           |
| C8  | 7402(4) | 4862(3) | 6148(3) | 22(1)           |
| C9  | 5100(4) | 2379(3) | 3914(3) | 24(1)           |
| C10 | 6236(4) | 3247(3) | 2784(3) | 22(1)           |
| C11 | 5265(4) | 2425(3) | 2947(3) | 24(1)           |
| C12 | 5756(4) | 3167(3) | 4914(3) | 22(1)           |
| C13 | 6818(4) | 4144(3) | 5147(2) | 20(1)           |
| C14 | 4203(4) | 1341(3) | 3861(3) | 23(1)           |
| C15 | 2474(5) | 1303(3) | 4008(3) | 30(1)           |
| C16 | 1734(5) | 317(3)  | 3959(3) | 34(1)           |
| C17 | 2662(5) | -616(3) | 3755(3) | 32(1)           |
| C18 | 4376(5) | -572(3) | 3607(3) | 28(1)           |
| C19 | 5165(4) | 405(3)  | 3671(3) | 25(1)           |
| C20 | 6709(5) | 3107(3) | -194(3) | 34(1)           |
| C21 | 4503(6) | 1519(4) | -928(3) | 37(1)           |
| C22 | 8712(5) | 6321(3) | 8183(3) | 33(1)           |
| C23 | 7003(5) | 5255(4) | 8878(3) | 32(1)           |
| C24 | 1411(5) | 2305(3) | 4233(4) | 38(1)           |
| C25 | 7035(5) | 445(3)  | 3545(3) | 31(1)           |
| P1  | 1404(1) | 3445(1) | 8025(1) | 30(1)           |
| F1  | 1854(4) | 4134(3) | 7383(2) | 61(1)           |
| F2  | 993(4)  | 2840(3) | 8735(3) | 73(1)           |

|     |          |          |           |       |
|-----|----------|----------|-----------|-------|
| F3  | -482(3)  | 3185(2)  | 7479(2)   | 51(1) |
| F4  | 2022(5)  | 2353(3)  | 7158(3)   | 78(1) |
| F5  | 3316(3)  | 3713(2)  | 8579(2)   | 45(1) |
| F6  | 855(4)   | 4589(3)  | 8908(2)   | 56(1) |
| N3  | -820(20) | 955(13)  | 1323(12)  | 98(4) |
| C26 | -150(30) | 192(15)  | 1235(13)  | 71(3) |
| C27 | 860(30)  | -774(15) | 999(15)   | 70(4) |
| C28 | -430(70) | 330(30)  | -1527(19) | 87(8) |
| C29 | -330(40) | 718(19)  | -375(18)  | 88(5) |
| O1  | 500(20)  | -42(19)  | -30(15)   | 87(4) |
| C30 | -130(60) | 240(30)  | 970(20)   | 76(4) |
| C31 | 570(70)  | -620(30) | 1310(30)  | 65(5) |

---

Table S3. Bond lengths [Å] and angles [°] for **1A**.

|             |          |              |           |
|-------------|----------|--------------|-----------|
| Te(1)-C(10) | 2.077(3) | C(16)-C(17)  | 1.383(6)  |
| Te(1)-C(13) | 2.069(3) | C(17)-H(17)  | 0.9500    |
| N(1)-C(3)   | 1.351(5) | C(17)-C(18)  | 1.391(5)  |
| N(1)-C(20)  | 1.471(5) | C(18)-H(18)  | 0.9500    |
| N(1)-C(21)  | 1.455(5) | C(18)-C(19)  | 1.394(5)  |
| N(2)-C(7)   | 1.336(5) | C(19)-C(25)  | 1.504(5)  |
| N(2)-C(22)  | 1.456(5) | C(20)-H(20A) | 0.9800    |
| N(2)-C(23)  | 1.460(5) | C(20)-H(20B) | 0.9800    |
| C(1)-H(1)   | 0.9500   | C(20)-H(20C) | 0.9800    |
| C(1)-C(2)   | 1.363(5) | C(21)-H(21A) | 0.9800    |
| C(1)-C(11)  | 1.424(5) | C(21)-H(21B) | 0.9800    |
| C(2)-H(2)   | 0.9500   | C(21)-H(21C) | 0.9800    |
| C(2)-C(3)   | 1.419(5) | C(22)-H(22A) | 0.9800    |
| C(3)-C(4)   | 1.420(5) | C(22)-H(22B) | 0.9800    |
| C(4)-H(4)   | 0.9500   | C(22)-H(22C) | 0.9800    |
| C(4)-C(10)  | 1.382(5) | C(23)-H(23A) | 0.9800    |
| C(5)-H(5)   | 0.9500   | C(23)-H(23B) | 0.9800    |
| C(5)-C(6)   | 1.358(5) | C(23)-H(23C) | 0.9800    |
| C(5)-C(12)  | 1.439(5) | C(24)-H(24A) | 0.9800    |
| C(6)-H(6)   | 0.9500   | C(24)-H(24B) | 0.9800    |
| C(6)-C(7)   | 1.428(5) | C(24)-H(24C) | 0.9800    |
| C(7)-C(8)   | 1.419(5) | C(25)-H(25A) | 0.9800    |
| C(8)-H(8)   | 0.9500   | C(25)-H(25B) | 0.9800    |
| C(8)-C(13)  | 1.379(5) | C(25)-H(25C) | 0.9800    |
| C(9)-C(11)  | 1.427(5) | P(1)-F(1)    | 1.599(3)  |
| C(9)-C(12)  | 1.417(5) | P(1)-F(2)    | 1.586(3)  |
| C(9)-C(14)  | 1.509(5) | P(1)-F(3)    | 1.589(3)  |
| C(10)-C(11) | 1.430(5) | P(1)-F(4)    | 1.572(3)  |
| C(12)-C(13) | 1.433(4) | P(1)-F(5)    | 1.610(3)  |
| C(14)-C(15) | 1.401(5) | P(1)-F(6)    | 1.604(3)  |
| C(14)-C(19) | 1.404(5) | N(3)-C(26)   | 1.114(9)  |
| C(15)-C(16) | 1.396(5) | C(26)-C(27)  | 1.451(10) |
| C(15)-C(24) | 1.515(5) | C(27)-H(27A) | 0.9800    |
| C(16)-H(16) | 0.9500   | C(27)-H(27B) | 0.9800    |

|                   |           |                   |          |
|-------------------|-----------|-------------------|----------|
| C(27)-H(27C)      | 0.9800    | C(12)-C(5)-H(5)   | 118.2    |
| C(28)-H(28A)      | 0.9800    | C(5)-C(6)-H(6)    | 119.6    |
| C(28)-H(28B)      | 0.9800    | C(5)-C(6)-C(7)    | 120.9(3) |
| C(28)-H(28C)      | 0.9800    | C(7)-C(6)-H(6)    | 119.6    |
| C(28)-C(29)       | 1.500(15) | N(2)-C(7)-C(6)    | 121.8(3) |
| C(29)-H(29A)      | 0.9900    | N(2)-C(7)-C(8)    | 121.2(3) |
| C(29)-H(29B)      | 0.9900    | C(8)-C(7)-C(6)    | 117.0(3) |
| C(29)-O(1)        | 1.444(15) | C(7)-C(8)-H(8)    | 119.1    |
| O(1)-C(30)        | 1.454(15) | C(13)-C(8)-C(7)   | 121.7(3) |
| C(30)-H(30A)      | 0.9900    | C(13)-C(8)-H(8)   | 119.1    |
| C(30)-H(30B)      | 0.9900    | C(11)-C(9)-C(14)  | 116.2(3) |
| C(30)-C(31)       | 1.518(15) | C(12)-C(9)-C(11)  | 127.7(3) |
| C(31)-H(31A)      | 0.9800    | C(12)-C(9)-C(14)  | 116.1(3) |
| C(31)-H(31B)      | 0.9800    | C(4)-C(10)-Te(1)  | 115.6(2) |
| C(31)-H(31C)      | 0.9800    | C(4)-C(10)-C(11)  | 122.6(3) |
| C(13)-Te(1)-C(10) | 95.29(13) | C(11)-C(10)-Te(1) | 121.8(2) |
| C(3)-N(1)-C(20)   | 120.8(3)  | C(1)-C(11)-C(9)   | 118.9(3) |
| C(3)-N(1)-C(21)   | 121.0(3)  | C(1)-C(11)-C(10)  | 114.6(3) |
| C(21)-N(1)-C(20)  | 118.1(3)  | C(9)-C(11)-C(10)  | 126.6(3) |
| C(7)-N(2)-C(22)   | 121.1(3)  | C(9)-C(12)-C(5)   | 119.0(3) |
| C(7)-N(2)-C(23)   | 122.1(3)  | C(9)-C(12)-C(13)  | 126.2(3) |
| C(22)-N(2)-C(23)  | 116.6(3)  | C(13)-C(12)-C(5)  | 114.8(3) |
| C(2)-C(1)-H(1)    | 118.2     | C(8)-C(13)-Te(1)  | 115.6(2) |
| C(2)-C(1)-C(11)   | 123.6(3)  | C(8)-C(13)-C(12)  | 122.1(3) |
| C(11)-C(1)-H(1)   | 118.2     | C(12)-C(13)-Te(1) | 122.3(2) |
| C(1)-C(2)-H(2)    | 119.5     | C(15)-C(14)-C(9)  | 121.8(3) |
| C(1)-C(2)-C(3)    | 121.0(3)  | C(15)-C(14)-C(19) | 120.5(3) |
| C(3)-C(2)-H(2)    | 119.5     | C(19)-C(14)-C(9)  | 117.8(3) |
| N(1)-C(3)-C(2)    | 121.3(3)  | C(14)-C(15)-C(24) | 121.7(3) |
| N(1)-C(3)-C(4)    | 121.7(3)  | C(16)-C(15)-C(14) | 118.6(3) |
| C(2)-C(3)-C(4)    | 117.1(3)  | C(16)-C(15)-C(24) | 119.8(3) |
| C(3)-C(4)-H(4)    | 119.5     | C(15)-C(16)-H(16) | 119.3    |
| C(10)-C(4)-C(3)   | 121.0(3)  | C(17)-C(16)-C(15) | 121.5(4) |
| C(10)-C(4)-H(4)   | 119.5     | C(17)-C(16)-H(16) | 119.3    |
| C(6)-C(5)-H(5)    | 118.2     | C(16)-C(17)-H(17) | 120.2    |
| C(6)-C(5)-C(12)   | 123.5(3)  | C(16)-C(17)-C(18) | 119.6(3) |



|                     |          |                     |            |
|---------------------|----------|---------------------|------------|
| C(18)-C(17)-H(17)   | 120.2    | H(24B)-C(24)-H(24C) | 109.5      |
| C(17)-C(18)-H(18)   | 119.8    | C(19)-C(25)-H(25A)  | 109.5      |
| C(17)-C(18)-C(19)   | 120.5(3) | C(19)-C(25)-H(25B)  | 109.5      |
| C(19)-C(18)-H(18)   | 119.8    | C(19)-C(25)-H(25C)  | 109.5      |
| C(14)-C(19)-C(25)   | 121.1(3) | H(25A)-C(25)-H(25B) | 109.5      |
| C(18)-C(19)-C(14)   | 119.4(3) | H(25A)-C(25)-H(25C) | 109.5      |
| C(18)-C(19)-C(25)   | 119.5(3) | H(25B)-C(25)-H(25C) | 109.5      |
| N(1)-C(20)-H(20A)   | 109.5    | F(1)-P(1)-F(5)      | 89.45(16)  |
| N(1)-C(20)-H(20B)   | 109.5    | F(1)-P(1)-F(6)      | 87.61(18)  |
| N(1)-C(20)-H(20C)   | 109.5    | F(2)-P(1)-F(1)      | 175.9(2)   |
| H(20A)-C(20)-H(20B) | 109.5    | F(2)-P(1)-F(3)      | 91.69(17)  |
| H(20A)-C(20)-H(20C) | 109.5    | F(2)-P(1)-F(5)      | 88.45(15)  |
| H(20B)-C(20)-H(20C) | 109.5    | F(2)-P(1)-F(6)      | 88.9(2)    |
| N(1)-C(21)-H(21A)   | 109.5    | F(3)-P(1)-F(1)      | 90.41(17)  |
| N(1)-C(21)-H(21B)   | 109.5    | F(3)-P(1)-F(5)      | 179.78(16) |
| N(1)-C(21)-H(21C)   | 109.5    | F(3)-P(1)-F(6)      | 90.48(15)  |
| H(21A)-C(21)-H(21B) | 109.5    | F(4)-P(1)-F(1)      | 90.6(2)    |
| H(21A)-C(21)-H(21C) | 109.5    | F(4)-P(1)-F(2)      | 92.9(2)    |
| H(21B)-C(21)-H(21C) | 109.5    | F(4)-P(1)-F(3)      | 91.53(17)  |
| N(2)-C(22)-H(22A)   | 109.5    | F(4)-P(1)-F(5)      | 88.64(17)  |
| N(2)-C(22)-H(22B)   | 109.5    | F(4)-P(1)-F(6)      | 177.3(2)   |
| N(2)-C(22)-H(22C)   | 109.5    | F(6)-P(1)-F(5)      | 89.35(15)  |
| H(22A)-C(22)-H(22B) | 109.5    | N(3)-C(26)-C(27)    | 171(2)     |
| H(22A)-C(22)-H(22C) | 109.5    | C(26)-C(27)-H(27A)  | 109.5      |
| H(22B)-C(22)-H(22C) | 109.5    | C(26)-C(27)-H(27B)  | 109.5      |
| N(2)-C(23)-H(23A)   | 109.5    | C(26)-C(27)-H(27C)  | 109.5      |
| N(2)-C(23)-H(23B)   | 109.5    | H(27A)-C(27)-H(27B) | 109.5      |
| N(2)-C(23)-H(23C)   | 109.5    | H(27A)-C(27)-H(27C) | 109.5      |
| H(23A)-C(23)-H(23B) | 109.5    | H(27B)-C(27)-H(27C) | 109.5      |
| H(23A)-C(23)-H(23C) | 109.5    | H(28A)-C(28)-H(28B) | 109.5      |
| H(23B)-C(23)-H(23C) | 109.5    | H(28A)-C(28)-H(28C) | 109.5      |
| C(15)-C(24)-H(24A)  | 109.5    | H(28B)-C(28)-H(28C) | 109.5      |
| C(15)-C(24)-H(24B)  | 109.5    | C(29)-C(28)-H(28A)  | 109.5      |
| C(15)-C(24)-H(24C)  | 109.5    | C(29)-C(28)-H(28B)  | 109.5      |
| H(24A)-C(24)-H(24B) | 109.5    | C(29)-C(28)-H(28C)  | 109.5      |
| H(24A)-C(24)-H(24C) | 109.5    | C(28)-C(29)-H(29A)  | 108.9      |

|                     |           |                     |       |
|---------------------|-----------|---------------------|-------|
| C(28)-C(29)-H(29B)  | 108.9     | H(30A)-C(30)-H(30B) | 109.0 |
| H(29A)-C(29)-H(29B) | 107.7     | C(31)-C(30)-H(30A)  | 110.9 |
| O(1)-C(29)-C(28)    | 113(2)    | C(31)-C(30)-H(30B)  | 110.9 |
| O(1)-C(29)-H(29A)   | 108.9     | C(30)-C(31)-H(31A)  | 109.5 |
| O(1)-C(29)-H(29B)   | 108.9     | C(30)-C(31)-H(31B)  | 109.5 |
| C(29)-O(1)-C(30)    | 102.8(19) | C(30)-C(31)-H(31C)  | 109.5 |
| O(1)-C(30)-H(30A)   | 110.9     | H(31A)-C(31)-H(31B) | 109.5 |
| O(1)-C(30)-H(30B)   | 110.9     | H(31A)-C(31)-H(31C) | 109.5 |
| O(1)-C(30)-C(31)    | 104.1(19) | H(31B)-C(31)-H(31C) | 109.5 |

---

Table S4. Anisotropic displacement parameters ( $\text{\AA}^2 \times 10^3$ ) for **1A**. The anisotropic displacement factor exponent takes the form:  $-2\pi^2 [h^2 a^{*2} U_{11} + \dots + 2 h k a^* b^* U_{12}]$

|     | U <sub>11</sub> | U <sub>22</sub> | U <sub>33</sub> | U <sub>23</sub> | U <sub>13</sub> | U <sub>12</sub> |
|-----|-----------------|-----------------|-----------------|-----------------|-----------------|-----------------|
| Te1 | 25(1)           | 22(1)           | 20(1)           | 8(1)            | 2(1)            | -4(1)           |
| N1  | 37(2)           | 30(2)           | 22(1)           | 10(1)           | -1(1)           | -4(1)           |
| N2  | 25(1)           | 32(2)           | 20(1)           | 10(1)           | 2(1)            | 1(1)            |
| C1  | 27(2)           | 24(2)           | 27(2)           | 11(1)           | -2(1)           | -4(1)           |
| C2  | 30(2)           | 24(2)           | 26(2)           | 9(1)            | -4(1)           | -1(1)           |
| C3  | 29(2)           | 26(2)           | 24(2)           | 11(1)           | 2(1)            | 4(1)            |
| C4  | 26(2)           | 22(2)           | 22(2)           | 7(1)            | 0(1)            | -4(1)           |
| C5  | 26(2)           | 26(2)           | 28(2)           | 14(1)           | 3(1)            | -1(1)           |
| C6  | 23(2)           | 30(2)           | 26(2)           | 15(1)           | 4(1)            | 1(1)            |
| C7  | 22(2)           | 26(2)           | 25(2)           | 11(1)           | 1(1)            | 3(1)            |
| C8  | 20(2)           | 24(2)           | 23(2)           | 10(1)           | 1(1)            | -1(1)           |
| C9  | 22(2)           | 23(2)           | 25(2)           | 10(1)           | 1(1)            | 2(1)            |
| C10 | 21(2)           | 23(2)           | 20(2)           | 6(1)            | -1(1)           | -1(1)           |
| C11 | 23(2)           | 21(2)           | 24(2)           | 7(1)            | -1(1)           | -2(1)           |
| C12 | 20(1)           | 23(2)           | 24(2)           | 11(1)           | 3(1)            | -1(1)           |
| C13 | 20(1)           | 23(2)           | 18(1)           | 10(1)           | 6(1)            | 3(1)            |
| C14 | 26(2)           | 21(2)           | 22(2)           | 9(1)            | 0(1)            | -2(1)           |
| C15 | 28(2)           | 27(2)           | 35(2)           | 13(2)           | 2(1)            | -1(1)           |
| C16 | 26(2)           | 32(2)           | 46(2)           | 17(2)           | 4(2)            | -4(1)           |
| C17 | 35(2)           | 24(2)           | 38(2)           | 16(2)           | 0(2)            | -6(1)           |
| C18 | 35(2)           | 21(2)           | 27(2)           | 12(1)           | -1(1)           | -1(1)           |
| C19 | 27(2)           | 25(2)           | 22(2)           | 10(1)           | 0(1)            | -1(1)           |
| C20 | 43(2)           | 37(2)           | 25(2)           | 15(2)           | 4(2)            | -4(2)           |
| C21 | 48(2)           | 36(2)           | 23(2)           | 9(2)            | -3(2)           | -5(2)           |
| C22 | 36(2)           | 33(2)           | 23(2)           | 7(2)            | -2(1)           | -6(2)           |
| C23 | 34(2)           | 41(2)           | 24(2)           | 15(2)           | 4(1)            | 3(2)            |
| C24 | 28(2)           | 25(2)           | 59(3)           | 15(2)           | 6(2)            | 0(2)            |
| C25 | 28(2)           | 29(2)           | 37(2)           | 14(2)           | 4(2)            | 3(1)            |
| P1  | 29(1)           | 30(1)           | 32(1)           | 15(1)           | 1(1)            | 1(1)            |
| F1  | 70(2)           | 74(2)           | 60(2)           | 48(2)           | 8(2)            | 7(2)            |
| F2  | 48(2)           | 103(3)          | 107(3)          | 84(2)           | -2(2)           | -13(2)          |

|     |         |        |        |        |        |         |
|-----|---------|--------|--------|--------|--------|---------|
| F3  | 38(1)   | 36(1)  | 65(2)  | 12(1)  | -18(1) | 0(1)    |
| F4  | 73(2)   | 48(2)  | 71(2)  | -11(2) | -10(2) | 28(2)   |
| F5  | 27(1)   | 68(2)  | 46(1)  | 30(1)  | 3(1)   | 0(1)    |
| F6  | 44(2)   | 56(2)  | 45(2)  | 1(1)   | 0(1)   | 8(1)    |
| N3  | 114(10) | 101(8) | 78(8)  | 38(7)  | 2(7)   | 5(7)    |
| C26 | 82(7)   | 78(6)  | 50(7)  | 26(6)  | 6(6)   | -23(5)  |
| C27 | 72(9)   | 67(7)  | 53(9)  | 9(7)   | 9(7)   | -26(5)  |
| C28 | 116(18) | 73(17) | 65(11) | 28(11) | -3(13) | -41(15) |
| C29 | 124(11) | 74(9)  | 62(9)  | 29(7)  | -3(9)  | -35(9)  |
| O1  | 115(8)  | 80(6)  | 58(6)  | 24(5)  | 2(7)   | -37(7)  |
| C30 | 90(7)   | 76(7)  | 56(7)  | 25(6)  | 2(7)   | -25(6)  |
| C31 | 67(11)  | 63(10) | 54(11) | 15(9)  | 3(10)  | -18(9)  |

---

Table S5. Hydrogen coordinates ( $\times 10^4$ ) and isotropic displacement parameters ( $\text{\AA}^2 \times 10^3$ ) for **1A**.

|      | x    | y     | z     | U(eq) |
|------|------|-------|-------|-------|
| H1   | 3715 | 1025  | 2094  | 31    |
| H2   | 3840 | 976   | 490   | 33    |
| H4   | 7007 | 3781  | 1745  | 30    |
| H5   | 4649 | 2365  | 5694  | 31    |
| H6   | 5544 | 3577  | 7352  | 30    |
| H8   | 8129 | 5490  | 6264  | 27    |
| H16  | 567  | 286   | 4068  | 41    |
| H17  | 2131 | -1282 | 3716  | 38    |
| H18  | 5015 | -1213 | 3463  | 33    |
| H20A | 7846 | 3128  | 142   | 52    |
| H20B | 6261 | 3851  | 108   | 52    |
| H20C | 6777 | 2870  | -938  | 52    |
| H21A | 4783 | 760   | -1049 | 56    |
| H21B | 4702 | 1641  | -1541 | 56    |
| H21C | 3305 | 1622  | -795  | 56    |
| H22A | 8196 | 6846  | 7942  | 49    |
| H22B | 9717 | 6029  | 7814  | 49    |
| H22C | 9049 | 6705  | 8929  | 49    |
| H23A | 5809 | 4983  | 8759  | 49    |
| H23B | 7153 | 5969  | 9493  | 49    |
| H23C | 7723 | 4713  | 8987  | 49    |
| H24A | 1901 | 2782  | 3944  | 57    |
| H24B | 1399 | 2727  | 4984  | 57    |
| H24C | 246  | 2055  | 3917  | 57    |
| H25A | 7478 | -290  | 3388  | 47    |
| H25B | 7635 | 998   | 4189  | 47    |
| H25C | 7210 | 651   | 2977  | 47    |
| H27A | 1680 | -789  | 515   | 105   |
| H27B | 110  | -1453 | 683   | 105   |
| H27C | 1464 | -733  | 1639  | 105   |

|      |       |       |       |     |
|------|-------|-------|-------|-----|
| H28A | -1566 | 453   | -1776 | 130 |
| H28B | -226  | -466  | -1860 | 130 |
| H28C | 426   | 750   | -1700 | 130 |
| H29A | 303   | 1453  | -37   | 106 |
| H29B | -1491 | 815   | -151  | 106 |
| H30A | -1392 | 202   | 912   | 91  |
| H30B | 284   | 1005  | 1474  | 91  |
| H31A | -223  | -1281 | 1036  | 98  |
| H31B | 707   | -311  | 2065  | 98  |
| H31C | 1673  | -836  | 1035  | 98  |

---

Table S6. Torsion angles [°] for **1A**.

---

|                |           |                 |           |
|----------------|-----------|-----------------|-----------|
| Te1-C10-C11-C1 | 179.3(2)  | C12-C9-C11-C1   | -174.9(3) |
| Te1-C10-C11-C9 | -0.4(5)   | C12-C9-C11-C10  | 4.7(6)    |
| N1-C3-C4-C10   | -179.3(3) | C12-C9-C14-C15  | 86.0(4)   |
| N2-C7-C8-C13   | -178.3(3) | C12-C9-C14-C19  | -93.2(4)  |
| C1-C2-C3-N1    | 178.7(3)  | C14-C9-C11-C1   | 8.6(5)    |
| C1-C2-C3-C4    | -1.6(5)   | C14-C9-C11-C10  | -171.7(3) |
| C2-C1-C11-C9   | -179.7(3) | C14-C9-C12-C5   | -8.2(5)   |
| C2-C1-C11-C10  | 0.6(5)    | C14-C9-C12-C13  | 172.3(3)  |
| C2-C3-C4-C10   | 1.1(5)    | C14-C15-C16-C17 | -1.0(6)   |
| C3-C4-C10-Te1  | 179.9(3)  | C15-C14-C19-C18 | 1.3(5)    |
| C3-C4-C10-C11  | 0.3(5)    | C15-C14-C19-C25 | -178.0(3) |
| C4-C10-C11-C1  | -1.2(5)   | C15-C16-C17-C18 | 0.8(6)    |
| C4-C10-C11-C9  | 179.1(3)  | C16-C17-C18-C19 | 0.4(6)    |
| C5-C6-C7-N2    | 179.7(3)  | C17-C18-C19-C14 | -1.5(5)   |
| C5-C6-C7-C8    | 0.2(5)    | C17-C18-C19-C25 | 177.9(3)  |
| C5-C12-C13-Te1 | 179.9(2)  | C19-C14-C15-C16 | -0.1(6)   |
| C5-C12-C13-C8  | 0.7(5)    | C19-C14-C15-C24 | 178.9(4)  |
| C6-C5-C12-C9   | -178.9(3) | C20-N1-C3-C2    | -175.6(4) |
| C6-C5-C12-C13  | 0.7(5)    | C20-N1-C3-C4    | 4.8(6)    |
| C6-C7-C8-C13   | 1.2(5)    | C21-N1-C3-C2    | 7.7(6)    |
| C7-C8-C13-Te1  | 179.1(3)  | C21-N1-C3-C4    | -171.9(4) |
| C7-C8-C13-C12  | -1.7(5)   | C22-N2-C7-C6    | 173.6(3)  |
| C9-C12-C13-Te1 | -0.5(5)   | C22-N2-C7-C8    | -7.0(5)   |
| C9-C12-C13-C8  | -179.7(3) | C23-N2-C7-C6    | -0.8(5)   |
| C9-C14-C15-C16 | -179.3(3) | C23-N2-C7-C8    | 178.6(3)  |
| C9-C14-C15-C24 | -0.3(6)   | C24-C15-C16-C17 | 180.0(4)  |
| C9-C14-C19-C18 | -179.4(3) | C28-C29-O1-C30  | -158(4)   |
| C9-C14-C19-C25 | 1.2(5)    | C29-O1-C30-C31  | 174(3)    |
| C11-C1-C2-C3   | 0.8(6)    |                 |           |
| C11-C9-C12-C5  | 175.4(3)  |                 |           |
| C11-C9-C12-C13 | -4.2(6)   |                 |           |
| C11-C9-C14-C15 | -97.1(4)  |                 |           |
| C11-C9-C14-C19 | 83.6(4)   |                 |           |
| C12-C5-C6-C7   | -1.2(6)   |                 |           |

Table S7. Crystal data and structure refinement for **1B**.

|                                                     |                                                                    |                          |
|-----------------------------------------------------|--------------------------------------------------------------------|--------------------------|
| Identification code                                 | <b>1B</b>                                                          |                          |
| Empirical formula                                   | C <sub>26</sub> H <sub>29</sub> F <sub>6</sub> N <sub>2</sub> P Te |                          |
| Formula weight                                      | 642.08                                                             |                          |
| Temperature                                         | 99.99(10) K                                                        |                          |
| Wavelength                                          | 1.54184 Å                                                          |                          |
| Crystal system                                      | monoclinic                                                         |                          |
| Space group                                         | <i>P</i> 2 <sub>1</sub> / <i>c</i>                                 |                          |
| Unit cell dimensions                                | <i>a</i> = 8.08690(10) Å                                           | <i>a</i> = 90°           |
|                                                     | <i>b</i> = 20.1974(2) Å                                            | <i>b</i> = 100.5010(10)° |
|                                                     | <i>c</i> = 15.9300(2) Å                                            | <i>g</i> = 90°           |
| Volume                                              | 2558.34(5) Å <sup>3</sup>                                          |                          |
| <i>Z</i>                                            | 4                                                                  |                          |
| Density (calculated)                                | 1.667 Mg/m <sup>3</sup>                                            |                          |
| Absorption coefficient                              | 10.330 mm <sup>-1</sup>                                            |                          |
| <i>F</i> (000)                                      | 1280                                                               |                          |
| Crystal color, morphology                           | dark green, block                                                  |                          |
| Crystal size                                        | 0.183 x 0.133 x 0.125 mm <sup>3</sup>                              |                          |
| Theta range for data collection                     | 3.571 to 77.854°                                                   |                          |
| Index ranges                                        | -7 ≤ <i>h</i> ≤ 10, -25 ≤ <i>k</i> ≤ 25, -19 ≤ <i>l</i> ≤ 20       |                          |
| Reflections collected                               | 43625                                                              |                          |
| Independent reflections                             | 5404 [ <i>R</i> (int) = 0.0572]                                    |                          |
| Observed reflections                                | 5219                                                               |                          |
| Completeness to theta = 74.504°                     | 100.0%                                                             |                          |
| Absorption correction                               | Multi-scan                                                         |                          |
| Max. and min. transmission                          | 1.00000 and 0.42674                                                |                          |
| Refinement method                                   | Full-matrix least-squares on <i>F</i> <sup>2</sup>                 |                          |
| Data / restraints / parameters                      | 5404 / 0 / 333                                                     |                          |
| Goodness-of-fit on <i>F</i> <sup>2</sup>            | 1.059                                                              |                          |
| Final <i>R</i> indices [ <i>I</i> > 2σ( <i>I</i> )] | <i>R</i> 1 = 0.0357, <i>wR</i> 2 = 0.0974                          |                          |
| <i>R</i> indices (all data)                         | <i>R</i> 1 = 0.0366, <i>wR</i> 2 = 0.0983                          |                          |
| Largest diff. peak and hole                         | 1.891 and -1.345 e.Å <sup>-3</sup>                                 |                          |



Table S8. Atomic coordinates ( $\times 10^4$ ) and equivalent isotropic displacement parameters ( $\text{\AA}^2 \times 10^3$ ) for **1B**.  $U_{\text{eq}}$  is defined as one third of the trace of the orthogonalized  $U_{ij}$  tensor.

|     | x       | y       | z       | $U_{\text{eq}}$ |
|-----|---------|---------|---------|-----------------|
| Te1 | 8067(1) | 4423(1) | 5129(1) | 18(1)           |
| N1  | 6691(3) | 6984(1) | 4593(2) | 20(1)           |
| N2  | 6934(3) | 1847(1) | 4491(2) | 23(1)           |
| C1  | 7096(3) | 5808(1) | 4723(2) | 16(1)           |
| C2  | 6345(3) | 6370(1) | 4286(2) | 16(1)           |
| C3  | 5196(3) | 6257(1) | 3506(2) | 20(1)           |
| C4  | 4887(4) | 5635(1) | 3198(2) | 18(1)           |
| C5  | 5010(3) | 3215(1) | 3160(2) | 19(1)           |
| C6  | 5382(4) | 2590(1) | 3444(2) | 22(1)           |
| C7  | 6523(3) | 2474(1) | 4219(2) | 20(1)           |
| C8  | 7199(3) | 3032(1) | 4689(2) | 19(1)           |
| C9  | 5240(3) | 4428(1) | 3247(2) | 16(1)           |
| C10 | 6755(3) | 5176(1) | 4415(2) | 16(1)           |
| C11 | 5633(3) | 5052(1) | 3622(2) | 15(1)           |
| C12 | 5702(3) | 3796(1) | 3606(2) | 16(1)           |
| C13 | 6811(3) | 3668(1) | 4395(2) | 16(1)           |
| C14 | 4301(4) | 4424(1) | 2340(2) | 16(1)           |
| C15 | 2547(4) | 4413(1) | 2132(2) | 18(1)           |
| C16 | 1776(4) | 4385(1) | 1270(2) | 20(1)           |
| C17 | 2702(4) | 4362(1) | 618(2)  | 21(1)           |
| C18 | 4454(4) | 4384(1) | 844(2)  | 22(1)           |
| C19 | 5266(4) | 4413(1) | 1687(2) | 21(1)           |
| C20 | 7936(4) | 7089(2) | 5364(2) | 24(1)           |
| C21 | 6062(4) | 7574(2) | 4111(2) | 28(1)           |
| C22 | 8246(4) | 1742(2) | 5233(2) | 32(1)           |
| C23 | 6467(4) | 1288(2) | 3914(2) | 29(1)           |
| C24 | 1485(4) | 4427(2) | 2816(2) | 26(1)           |
| C25 | 1854(5) | 4299(2) | -302(2) | 31(1)           |
| C26 | 7159(4) | 4425(2) | 1911(2) | 33(1)           |
| P1  | 9942(1) | 8066(1) | 7632(1) | 28(1)           |
| F1  | 9176(3) | 7343(1) | 7652(2) | 53(1)           |

|    |          |         |         |       |
|----|----------|---------|---------|-------|
| F2 | 10720(3) | 8790(1) | 7615(2) | 49(1) |
| F3 | 11780(2) | 7786(1) | 8017(2) | 44(1) |
| F4 | 9624(3)  | 8195(1) | 8584(1) | 46(1) |
| F5 | 8113(3)  | 8345(2) | 7252(2) | 53(1) |
| F6 | 10279(3) | 7944(1) | 6687(1) | 45(1) |

---

Table S9. Bond lengths [Å] and angles [°] for **1B**.

|             |          |              |          |
|-------------|----------|--------------|----------|
| Te(1)-C(10) | 2.072(3) | C(16)-C(17)  | 1.388(4) |
| Te(1)-C(13) | 2.071(3) | C(17)-C(18)  | 1.398(5) |
| N(1)-C(2)   | 1.343(4) | C(17)-C(25)  | 1.505(4) |
| N(1)-C(20)  | 1.455(4) | C(18)-H(18)  | 0.9500   |
| N(1)-C(21)  | 1.458(4) | C(18)-C(19)  | 1.384(5) |
| N(2)-C(7)   | 1.361(4) | C(19)-C(26)  | 1.508(4) |
| N(2)-C(22)  | 1.453(4) | C(20)-H(20A) | 0.9800   |
| N(2)-C(23)  | 1.461(4) | C(20)-H(20B) | 0.9800   |
| C(1)-H(1)   | 0.9500   | C(20)-H(20C) | 0.9800   |
| C(1)-C(2)   | 1.411(4) | C(21)-H(21A) | 0.9800   |
| C(1)-C(10)  | 1.377(4) | C(21)-H(21B) | 0.9800   |
| C(2)-C(3)   | 1.428(4) | C(21)-H(21C) | 0.9800   |
| C(3)-H(3)   | 0.9500   | C(22)-H(22A) | 0.9800   |
| C(3)-C(4)   | 1.355(4) | C(22)-H(22B) | 0.9800   |
| C(4)-H(4)   | 0.9500   | C(22)-H(22C) | 0.9800   |
| C(4)-C(11)  | 1.435(4) | C(23)-H(23A) | 0.9800   |
| C(5)-H(5)   | 0.9500   | C(23)-H(23B) | 0.9800   |
| C(5)-C(6)   | 1.357(4) | C(23)-H(23C) | 0.9800   |
| C(5)-C(12)  | 1.431(4) | C(24)-H(24A) | 0.9800   |
| C(6)-H(6)   | 0.9500   | C(24)-H(24B) | 0.9800   |
| C(6)-C(7)   | 1.420(4) | C(24)-H(24C) | 0.9800   |
| C(7)-C(8)   | 1.406(4) | C(24)-H(24D) | 0.9800   |
| C(8)-H(8)   | 0.9500   | C(24)-H(24E) | 0.9800   |
| C(8)-C(13)  | 1.385(4) | C(24)-H(24F) | 0.9800   |
| C(9)-C(11)  | 1.405(4) | C(25)-H(25A) | 0.9800   |
| C(9)-C(12)  | 1.421(4) | C(25)-H(25B) | 0.9800   |
| C(9)-C(14)  | 1.505(4) | C(25)-H(25C) | 0.9800   |
| C(10)-C(11) | 1.436(4) | C(26)-H(26A) | 0.9800   |
| C(12)-C(13) | 1.429(4) | C(26)-H(26B) | 0.9800   |
| C(14)-C(15) | 1.397(4) | C(26)-H(26C) | 0.9800   |
| C(14)-C(19) | 1.410(4) | P(1)-F(1)    | 1.589(2) |
| C(15)-C(16) | 1.401(4) | P(1)-F(2)    | 1.593(2) |
| C(15)-C(24) | 1.505(4) | P(1)-F(3)    | 1.604(2) |
| C(16)-H(16) | 0.9500   | P(1)-F(4)    | 1.606(2) |

|                   |           |                     |          |
|-------------------|-----------|---------------------|----------|
| P(1)-F(5)         | 1.596(2)  | C(1)-C(10)-Te(1)    | 115.8(2) |
| P(1)-F(6)         | 1.597(2)  | C(1)-C(10)-C(11)    | 121.9(2) |
| C(13)-Te(1)-C(10) | 94.63(12) | C(11)-C(10)-Te(1)   | 122.2(2) |
| C(2)-N(1)-C(20)   | 120.5(2)  | C(4)-C(11)-C(10)    | 114.5(2) |
| C(2)-N(1)-C(21)   | 122.2(3)  | C(9)-C(11)-C(4)     | 119.5(2) |
| C(20)-N(1)-C(21)  | 116.5(2)  | C(9)-C(11)-C(10)    | 126.0(2) |
| C(7)-N(2)-C(22)   | 119.7(3)  | C(9)-C(12)-C(5)     | 119.2(2) |
| C(7)-N(2)-C(23)   | 120.0(3)  | C(9)-C(12)-C(13)    | 126.4(2) |
| C(22)-N(2)-C(23)  | 117.7(3)  | C(13)-C(12)-C(5)    | 114.4(2) |
| C(2)-C(1)-H(1)    | 119.0     | C(8)-C(13)-Te(1)    | 115.8(2) |
| C(10)-C(1)-H(1)   | 119.0     | C(8)-C(13)-C(12)    | 122.2(2) |
| C(10)-C(1)-C(2)   | 122.1(2)  | C(12)-C(13)-Te(1)   | 121.9(2) |
| N(1)-C(2)-C(1)    | 121.4(3)  | C(15)-C(14)-C(9)    | 122.7(3) |
| N(1)-C(2)-C(3)    | 121.6(3)  | C(15)-C(14)-C(19)   | 120.0(3) |
| C(1)-C(2)-C(3)    | 117.0(2)  | C(19)-C(14)-C(9)    | 117.3(3) |
| C(2)-C(3)-H(3)    | 119.6     | C(14)-C(15)-C(16)   | 118.9(3) |
| C(4)-C(3)-C(2)    | 120.7(3)  | C(14)-C(15)-C(24)   | 121.1(3) |
| C(4)-C(3)-H(3)    | 119.6     | C(16)-C(15)-C(24)   | 120.0(3) |
| C(3)-C(4)-H(4)    | 118.1     | C(15)-C(16)-H(16)   | 119.0    |
| C(3)-C(4)-C(11)   | 123.8(3)  | C(17)-C(16)-C(15)   | 122.1(3) |
| C(11)-C(4)-H(4)   | 118.1     | C(17)-C(16)-H(16)   | 119.0    |
| C(6)-C(5)-H(5)    | 118.1     | C(16)-C(17)-C(18)   | 117.7(3) |
| C(6)-C(5)-C(12)   | 123.8(3)  | C(16)-C(17)-C(25)   | 121.3(3) |
| C(12)-C(5)-H(5)   | 118.1     | C(18)-C(17)-C(25)   | 121.0(3) |
| C(5)-C(6)-H(6)    | 119.6     | C(17)-C(18)-H(18)   | 119.0    |
| C(5)-C(6)-C(7)    | 120.8(3)  | C(19)-C(18)-C(17)   | 122.1(3) |
| C(7)-C(6)-H(6)    | 119.6     | C(19)-C(18)-H(18)   | 119.0    |
| N(2)-C(7)-C(6)    | 120.8(3)  | C(14)-C(19)-C(26)   | 120.0(3) |
| N(2)-C(7)-C(8)    | 121.8(3)  | C(18)-C(19)-C(14)   | 119.2(3) |
| C(8)-C(7)-C(6)    | 117.4(3)  | C(18)-C(19)-C(26)   | 120.8(3) |
| C(7)-C(8)-H(8)    | 119.3     | N(1)-C(20)-H(20A)   | 109.5    |
| C(13)-C(8)-C(7)   | 121.4(3)  | N(1)-C(20)-H(20B)   | 109.5    |
| C(13)-C(8)-H(8)   | 119.3     | N(1)-C(20)-H(20C)   | 109.5    |
| C(11)-C(9)-C(12)  | 127.8(3)  | H(20A)-C(20)-H(20B) | 109.5    |
| C(11)-C(9)-C(14)  | 116.7(2)  | H(20A)-C(20)-H(20C) | 109.5    |
| C(12)-C(9)-C(14)  | 115.5(2)  | H(20B)-C(20)-H(20C) | 109.5    |

|                     |       |                     |            |
|---------------------|-------|---------------------|------------|
| N(1)-C(21)-H(21A)   | 109.5 | H(24C)-C(24)-H(24D) | 56.3       |
| N(1)-C(21)-H(21B)   | 109.5 | H(24C)-C(24)-H(24E) | 56.3       |
| N(1)-C(21)-H(21C)   | 109.5 | H(24C)-C(24)-H(24F) | 141.1      |
| H(21A)-C(21)-H(21B) | 109.5 | H(24D)-C(24)-H(24E) | 109.5      |
| H(21A)-C(21)-H(21C) | 109.5 | H(24D)-C(24)-H(24F) | 109.5      |
| H(21B)-C(21)-H(21C) | 109.5 | H(24E)-C(24)-H(24F) | 109.5      |
| N(2)-C(22)-H(22A)   | 109.5 | C(17)-C(25)-H(25A)  | 109.5      |
| N(2)-C(22)-H(22B)   | 109.5 | C(17)-C(25)-H(25B)  | 109.5      |
| N(2)-C(22)-H(22C)   | 109.5 | C(17)-C(25)-H(25C)  | 109.5      |
| H(22A)-C(22)-H(22B) | 109.5 | H(25A)-C(25)-H(25B) | 109.5      |
| H(22A)-C(22)-H(22C) | 109.5 | H(25A)-C(25)-H(25C) | 109.5      |
| H(22B)-C(22)-H(22C) | 109.5 | H(25B)-C(25)-H(25C) | 109.5      |
| N(2)-C(23)-H(23A)   | 109.5 | C(19)-C(26)-H(26A)  | 109.5      |
| N(2)-C(23)-H(23B)   | 109.5 | C(19)-C(26)-H(26B)  | 109.5      |
| N(2)-C(23)-H(23C)   | 109.5 | C(19)-C(26)-H(26C)  | 109.5      |
| H(23A)-C(23)-H(23B) | 109.5 | H(26A)-C(26)-H(26B) | 109.5      |
| H(23A)-C(23)-H(23C) | 109.5 | H(26A)-C(26)-H(26C) | 109.5      |
| H(23B)-C(23)-H(23C) | 109.5 | H(26B)-C(26)-H(26C) | 109.5      |
| C(15)-C(24)-H(24A)  | 109.5 | F(1)-P(1)-F(2)      | 179.70(17) |
| C(15)-C(24)-H(24B)  | 109.5 | F(1)-P(1)-F(3)      | 90.31(14)  |
| C(15)-C(24)-H(24C)  | 109.5 | F(1)-P(1)-F(4)      | 90.01(14)  |
| C(15)-C(24)-H(24D)  | 109.5 | F(1)-P(1)-F(5)      | 89.67(15)  |
| C(15)-C(24)-H(24E)  | 109.5 | F(1)-P(1)-F(6)      | 90.63(14)  |
| C(15)-C(24)-H(24F)  | 109.5 | F(2)-P(1)-F(3)      | 89.40(14)  |
| H(24A)-C(24)-H(24B) | 109.5 | F(2)-P(1)-F(4)      | 89.91(13)  |
| H(24A)-C(24)-H(24C) | 109.5 | F(2)-P(1)-F(5)      | 90.62(15)  |
| H(24A)-C(24)-H(24D) | 141.1 | F(2)-P(1)-F(6)      | 89.44(13)  |
| H(24A)-C(24)-H(24E) | 56.3  | F(3)-P(1)-F(4)      | 89.59(12)  |
| H(24A)-C(24)-H(24F) | 56.3  | F(5)-P(1)-F(3)      | 179.80(15) |
| H(24B)-C(24)-H(24C) | 109.5 | F(5)-P(1)-F(4)      | 90.21(13)  |
| H(24B)-C(24)-H(24D) | 56.3  | F(5)-P(1)-F(6)      | 90.14(13)  |
| H(24B)-C(24)-H(24E) | 141.1 | F(6)-P(1)-F(3)      | 90.06(13)  |
| H(24B)-C(24)-H(24F) | 56.3  | F(6)-P(1)-F(4)      | 179.27(13) |

Table S10. Anisotropic displacement parameters ( $\text{\AA}^2 \times 10^3$ ) for **1B**. The anisotropic displacement factor exponent takes the form:  $-2\pi^2 [h^2 a^{*2} U_{11} + \dots + 2 h k a^* b^* U_{12}]$

|     | $U_{11}$ | $U_{22}$ | $U_{33}$ | $U_{23}$ | $U_{13}$ | $U_{12}$ |
|-----|----------|----------|----------|----------|----------|----------|
| Te1 | 17(1)    | 16(1)    | 19(1)    | 0(1)     | -4(1)    | 1(1)     |
| N1  | 20(1)    | 16(1)    | 25(1)    | -3(1)    | 4(1)     | -2(1)    |
| N2  | 25(1)    | 18(1)    | 25(1)    | 2(1)     | 3(1)     | 1(1)     |
| C1  | 12(1)    | 19(1)    | 17(1)    | -2(1)    | 1(1)     | 1(1)     |
| C2  | 12(1)    | 17(1)    | 19(1)    | -2(1)    | 3(1)     | -2(1)    |
| C3  | 18(1)    | 18(1)    | 23(1)    | 2(1)     | 0(1)     | 0(1)     |
| C4  | 16(1)    | 17(1)    | 20(1)    | 2(1)     | -3(1)    | 1(1)     |
| C5  | 19(1)    | 17(1)    | 19(1)    | -3(1)    | -2(1)    | -1(1)    |
| C6  | 22(1)    | 18(1)    | 26(2)    | -2(1)    | 2(1)     | -1(1)    |
| C7  | 18(1)    | 19(1)    | 23(1)    | 3(1)     | 6(1)     | 2(1)     |
| C8  | 16(1)    | 22(1)    | 18(1)    | 3(1)     | 0(1)     | 1(1)     |
| C9  | 11(1)    | 18(1)    | 19(1)    | 0(1)     | 4(1)     | 0(1)     |
| C10 | 14(1)    | 16(1)    | 18(1)    | 4(1)     | 2(1)     | 3(1)     |
| C11 | 11(1)    | 17(1)    | 16(1)    | 2(1)     | 1(1)     | 1(1)     |
| C12 | 12(1)    | 19(1)    | 16(1)    | -2(1)    | 0(1)     | -1(1)    |
| C13 | 13(1)    | 19(1)    | 16(1)    | -4(1)    | 2(1)     | -2(1)    |
| C14 | 16(1)    | 15(1)    | 15(1)    | -2(1)    | 0(1)     | 0(1)     |
| C15 | 16(1)    | 18(1)    | 18(1)    | 1(1)     | -2(1)    | -1(1)    |
| C16 | 16(1)    | 19(1)    | 24(2)    | -1(1)    | -3(1)    | 0(1)     |
| C17 | 27(2)    | 16(1)    | 17(1)    | 1(1)     | -2(1)    | 1(1)     |
| C18 | 27(2)    | 22(2)    | 19(2)    | 1(1)     | 6(1)     | 1(1)     |
| C19 | 18(1)    | 23(2)    | 22(2)    | 1(1)     | 3(1)     | -1(1)    |
| C20 | 21(1)    | 22(1)    | 27(2)    | -5(1)    | 0(1)     | -4(1)    |
| C21 | 29(2)    | 16(1)    | 38(2)    | 1(1)     | 2(1)     | 0(1)     |
| C22 | 35(2)    | 19(2)    | 36(2)    | 8(1)     | -5(1)    | 4(1)     |
| C23 | 34(2)    | 17(1)    | 34(2)    | 1(1)     | 6(1)     | 2(1)     |
| C24 | 14(1)    | 38(2)    | 26(2)    | -4(1)    | 0(1)     | -1(1)    |
| C25 | 37(2)    | 33(2)    | 18(2)    | 1(1)     | -4(1)    | 1(1)     |
| C26 | 19(2)    | 52(2)    | 29(2)    | -1(1)    | 6(1)     | -2(1)    |
| P1  | 18(1)    | 41(1)    | 24(1)    | -6(1)    | 2(1)     | -10(1)   |
| F1  | 50(1)    | 49(1)    | 61(2)    | -4(1)    | 12(1)    | -26(1)   |

|    |       |       |       |        |       |        |
|----|-------|-------|-------|--------|-------|--------|
| F2 | 51(1) | 43(1) | 52(1) | -7(1)  | 12(1) | -18(1) |
| F3 | 23(1) | 68(2) | 40(1) | 1(1)   | 2(1)  | 1(1)   |
| F4 | 35(1) | 76(2) | 28(1) | -7(1)  | 10(1) | -6(1)  |
| F5 | 25(1) | 82(2) | 50(1) | 3(1)   | -1(1) | 2(1)   |
| F6 | 40(1) | 70(2) | 25(1) | -13(1) | 7(1)  | -14(1) |

---

Table S11. Hydrogen coordinates ( $\times 10^4$ ) and isotropic displacement parameters ( $\text{\AA}^2 \times 10^3$ ) for **1B**.

|      | x    | y    | z    | U(eq) |
|------|------|------|------|-------|
| H1   | 7862 | 5866 | 5245 | 20    |
| H3   | 4642 | 6622 | 3199 | 24    |
| H4   | 4132 | 5582 | 2671 | 22    |
| H5   | 4246 | 3271 | 2637 | 23    |
| H6   | 4874 | 2225 | 3119 | 27    |
| H8   | 7936 | 2970 | 5220 | 23    |
| H16  | 583  | 4381 | 1128 | 24    |
| H18  | 5109 | 4379 | 406  | 27    |
| H20A | 7653 | 6817 | 5827 | 36    |
| H20B | 7943 | 7557 | 5526 | 36    |
| H20C | 9051 | 6964 | 5258 | 36    |
| H21A | 6753 | 7664 | 3678 | 42    |
| H21B | 6117 | 7952 | 4500 | 42    |
| H21C | 4893 | 7501 | 3830 | 42    |
| H22A | 9307 | 1927 | 5124 | 47    |
| H22B | 8382 | 1266 | 5346 | 47    |
| H22C | 7934 | 1962 | 5730 | 47    |
| H23A | 5249 | 1293 | 3707 | 43    |
| H23B | 6785 | 873  | 4221 | 43    |
| H23C | 7052 | 1323 | 3429 | 43    |
| H24A | 1742 | 4039 | 3186 | 32    |
| H24B | 293  | 4421 | 2550 | 32    |
| H24C | 1729 | 4831 | 3157 | 32    |
| H24D | 767  | 4821 | 2743 | 32    |
| H24E | 2217 | 4440 | 3378 | 32    |
| H24F | 780  | 4029 | 2772 | 32    |
| H25A | 1537 | 3836 | -426 | 46    |
| H25B | 2628 | 4442 | -673 | 46    |
| H25C | 844  | 4577 | -405 | 46    |
| H26A | 7522 | 4810 | 2272 | 50    |
| H26B | 7628 | 4453 | 1387 | 50    |



H26C

7559

4019

2220

50

---

Table S12. Torsion angles [°] for **1B**.

---

|                |             |                 |           |
|----------------|-------------|-----------------|-----------|
| Te1-C10-C11-C4 | -177.57(19) | C12-C9-C11-C4   | -172.7(3) |
| Te1-C10-C11-C9 | 2.1(4)      | C12-C9-C11-C10  | 7.6(5)    |
| N1-C2-C3-C4    | 178.8(3)    | C12-C9-C14-C15  | 92.2(3)   |
| N2-C7-C8-C13   | 178.1(3)    | C12-C9-C14-C19  | -86.1(3)  |
| C1-C2-C3-C4    | -1.5(4)     | C14-C9-C11-C4   | 11.0(4)   |
| C1-C10-C11-C4  | -1.3(4)     | C14-C9-C11-C10  | -168.6(2) |
| C1-C10-C11-C9  | 178.4(3)    | C14-C9-C12-C5   | -11.0(4)  |
| C2-C1-C10-Te1  | 177.6(2)    | C14-C9-C12-C13  | 169.6(2)  |
| C2-C1-C10-C11  | 1.0(4)      | C14-C15-C16-C17 | 0.6(4)    |
| C2-C3-C4-C11   | 1.3(5)      | C15-C14-C19-C18 | -0.7(4)   |
| C3-C4-C11-C9   | -179.6(3)   | C15-C14-C19-C26 | -180.0(3) |
| C3-C4-C11-C10  | 0.1(4)      | C15-C16-C17-C18 | -1.5(4)   |
| C5-C6-C7-N2    | -178.1(3)   | C15-C16-C17-C25 | 177.0(3)  |
| C5-C6-C7-C8    | 2.0(4)      | C16-C17-C18-C19 | 1.4(4)    |
| C5-C12-C13-Te1 | 176.86(18)  | C17-C18-C19-C14 | -0.3(4)   |
| C5-C12-C13-C8  | 1.2(4)      | C17-C18-C19-C26 | 179.0(3)  |
| C6-C5-C12-C9   | 179.3(3)    | C19-C14-C15-C16 | 0.6(4)    |
| C6-C5-C12-C13  | -1.2(4)     | C19-C14-C15-C24 | -179.7(2) |
| C6-C7-C8-C13   | -2.1(4)     | C20-N1-C2-C1    | 3.7(4)    |
| C7-C8-C13-Te1  | -175.5(2)   | C20-N1-C2-C3    | -176.6(3) |
| C7-C8-C13-C12  | 0.4(4)      | C21-N1-C2-C1    | 173.7(3)  |
| C9-C12-C13-Te1 | -3.7(4)     | C21-N1-C2-C3    | -6.6(4)   |
| C9-C12-C13-C8  | -179.4(3)   | C22-N2-C7-C6    | 173.0(3)  |
| C9-C14-C15-C16 | -177.7(2)   | C22-N2-C7-C8    | -7.2(4)   |
| C9-C14-C15-C24 | 2.0(4)      | C23-N2-C7-C6    | 11.8(4)   |
| C9-C14-C19-C18 | 177.7(2)    | C23-N2-C7-C8    | -168.3(3) |
| C9-C14-C19-C26 | -1.6(4)     | C24-C15-C16-C17 | -179.1(3) |
| C10-C1-C2-N1   | -179.9(2)   | C25-C17-C18-C19 | -177.1(3) |
| C10-C1-C2-C3   | 0.4(4)      |                 |           |
| C11-C9-C12-C5  | 172.7(3)    |                 |           |
| C11-C9-C12-C13 | -6.7(5)     |                 |           |
| C11-C9-C14-C15 | -91.0(3)    |                 |           |
| C11-C9-C14-C19 | 90.6(3)     |                 |           |
| C12-C5-C6-C7   | -0.4(4)     |                 |           |

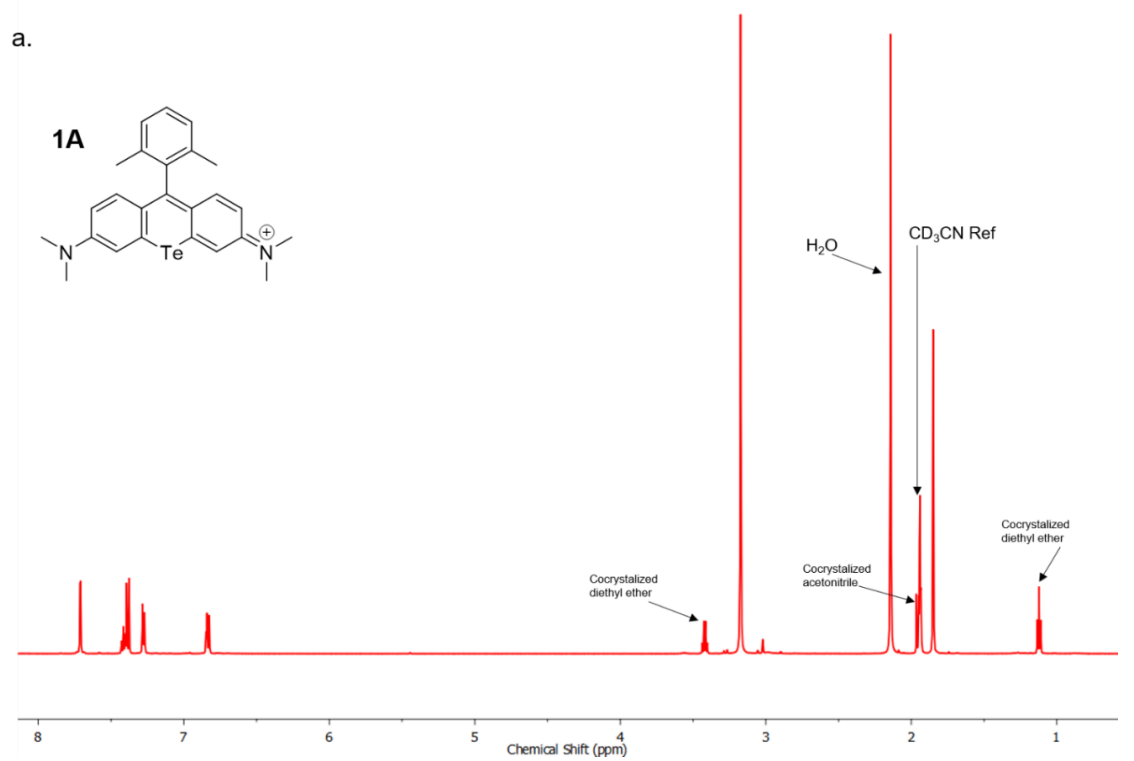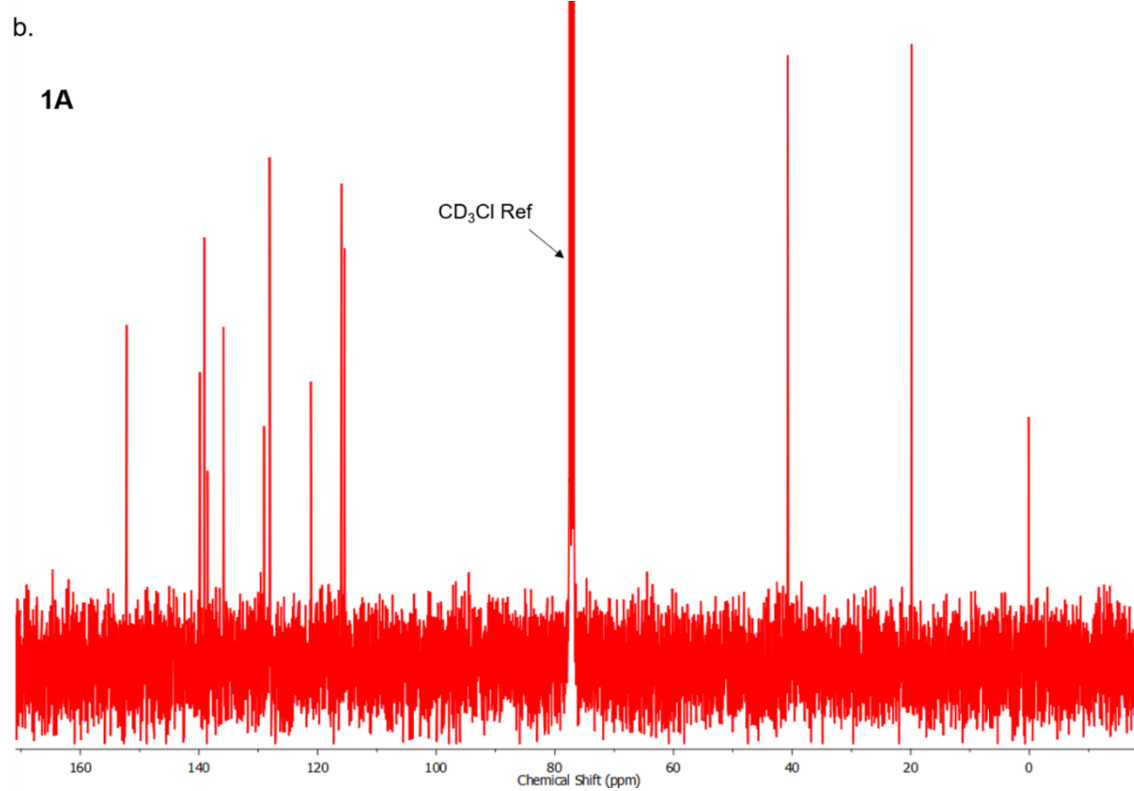

Figure S1. a.)  $^1\text{H}$  NMR of **1A** in  $\text{CD}_3\text{CN}$  and b.)  $^{13}\text{C}$  NMR of **1A** in  $\text{CDCl}_3$ . Residual solvent labeled according to Ref<sup>2</sup>.

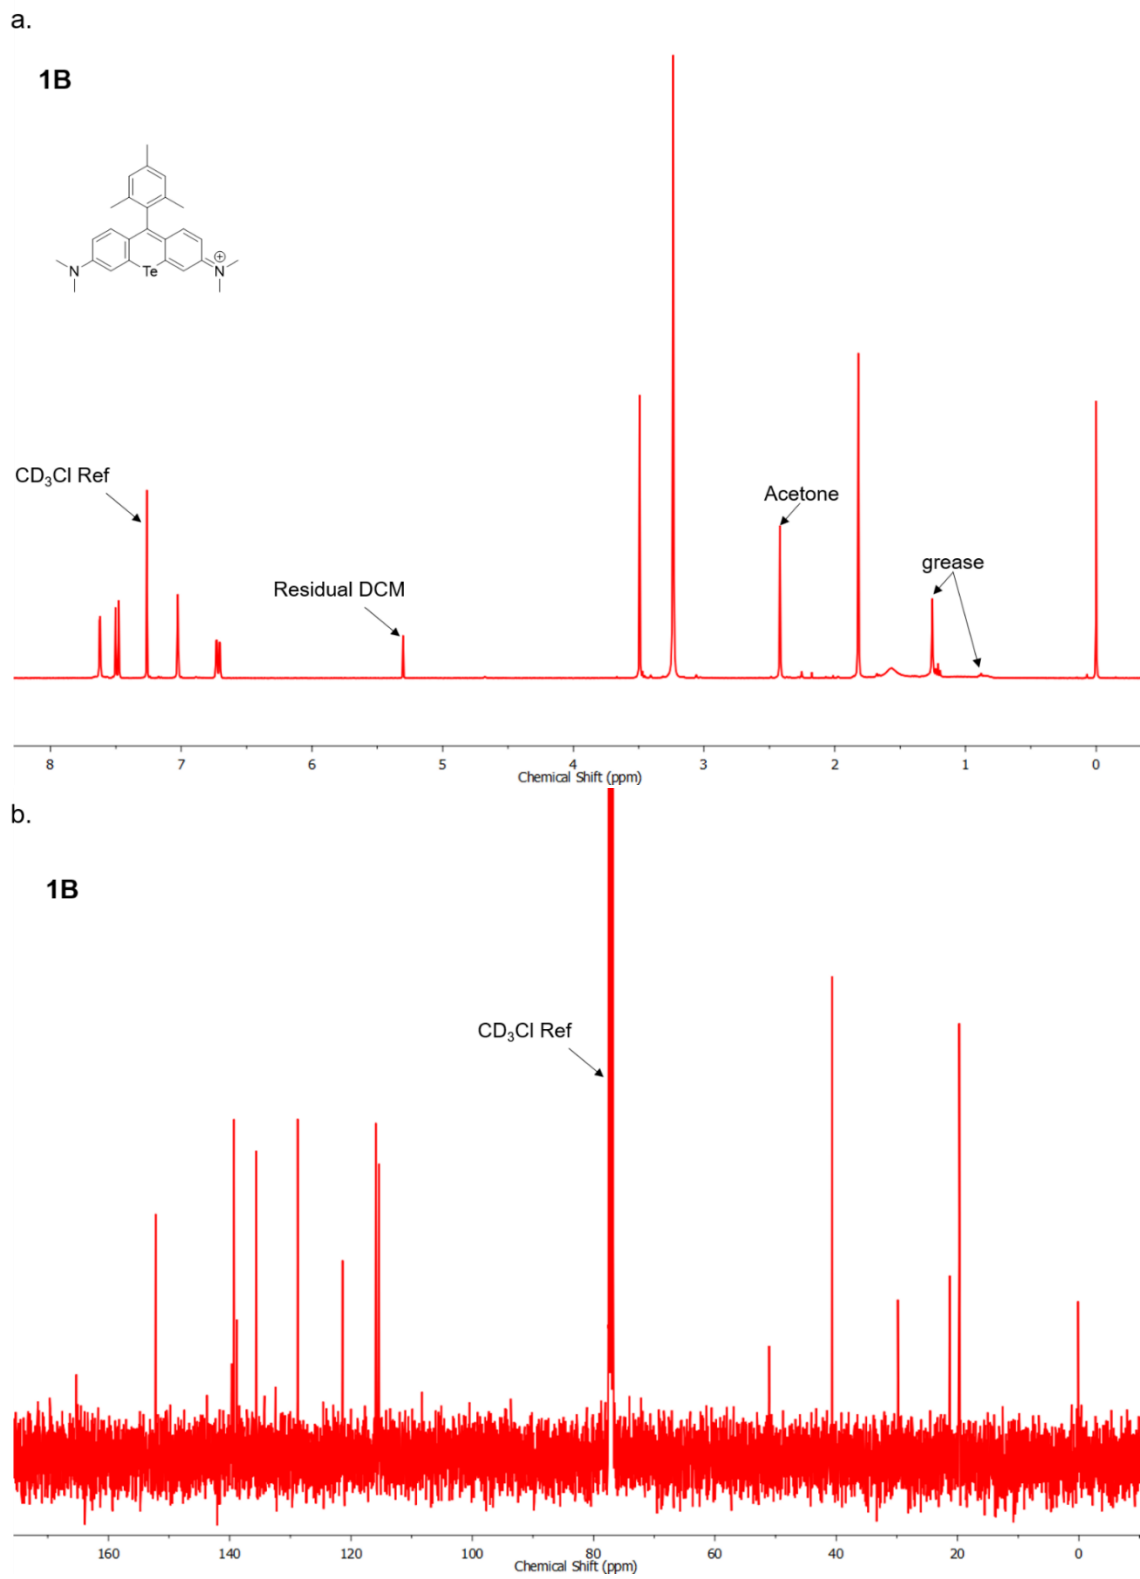

Figure S2. a.) <sup>1</sup>H NMR of **1B** in CDCl<sub>3</sub> and b.) <sup>13</sup>C NMR of **1B** in CDCl<sub>3</sub>. Residual solvent labeled according to Ref<sup>2</sup>.

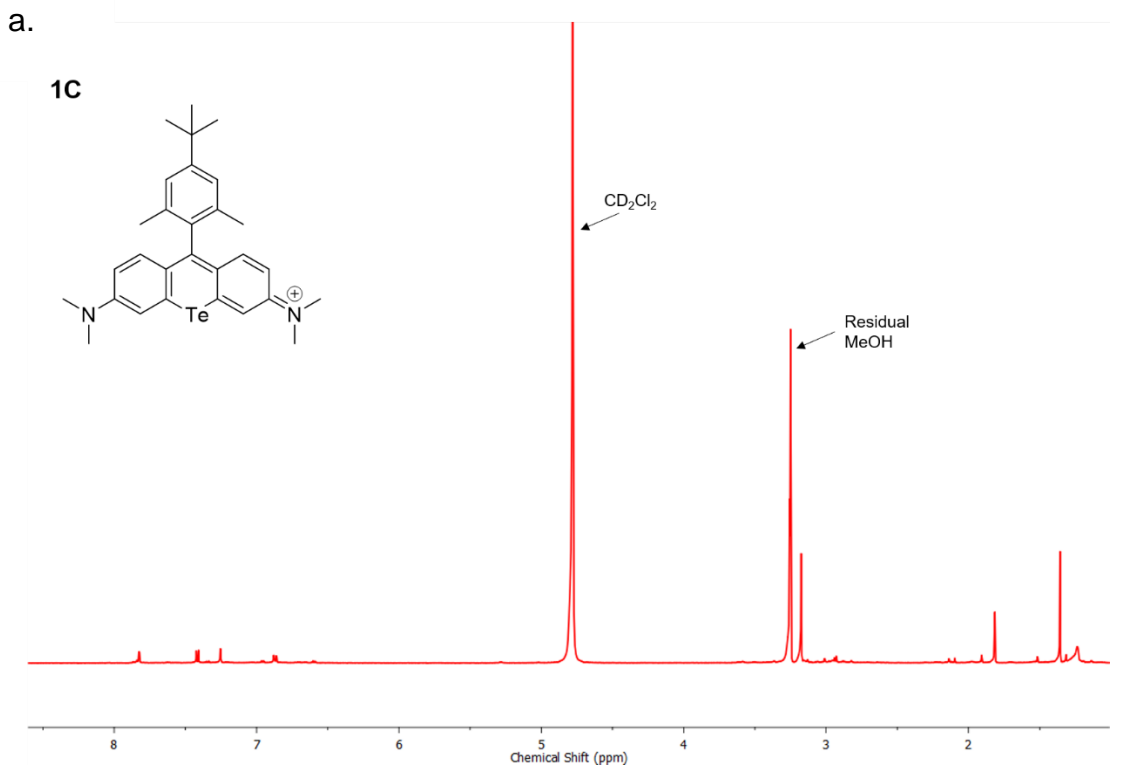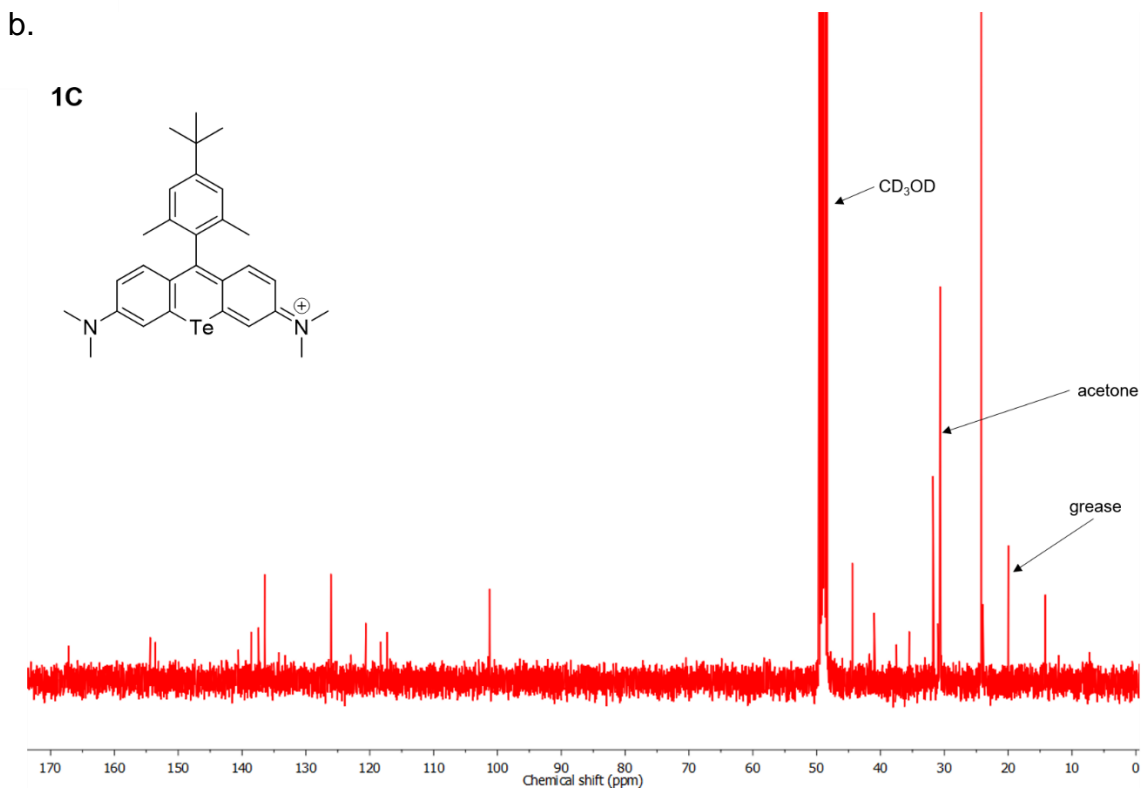

Figure S3. a.) <sup>1</sup>H NMR of **1C** in CD<sub>2</sub>Cl<sub>2</sub> and b.) <sup>13</sup>C NMR of **1C** in CD<sub>3</sub>OD. Residual solvent labeled according to Ref<sup>2</sup>.

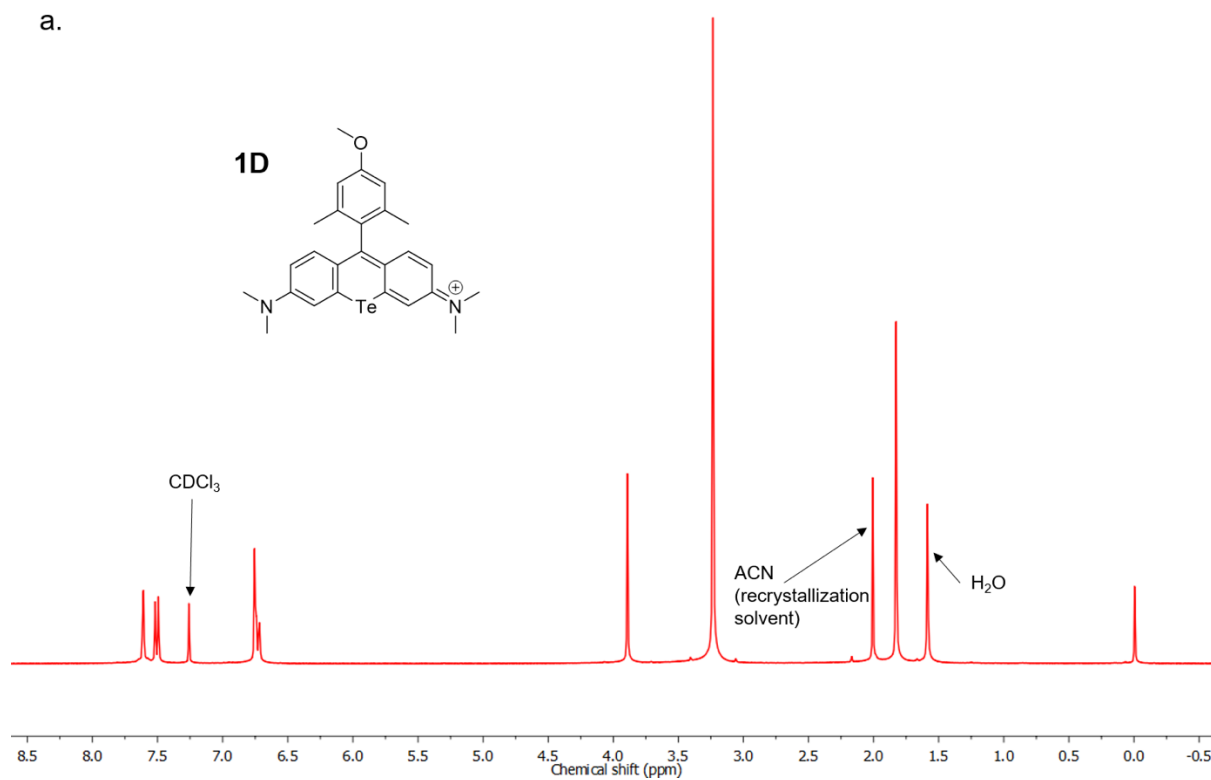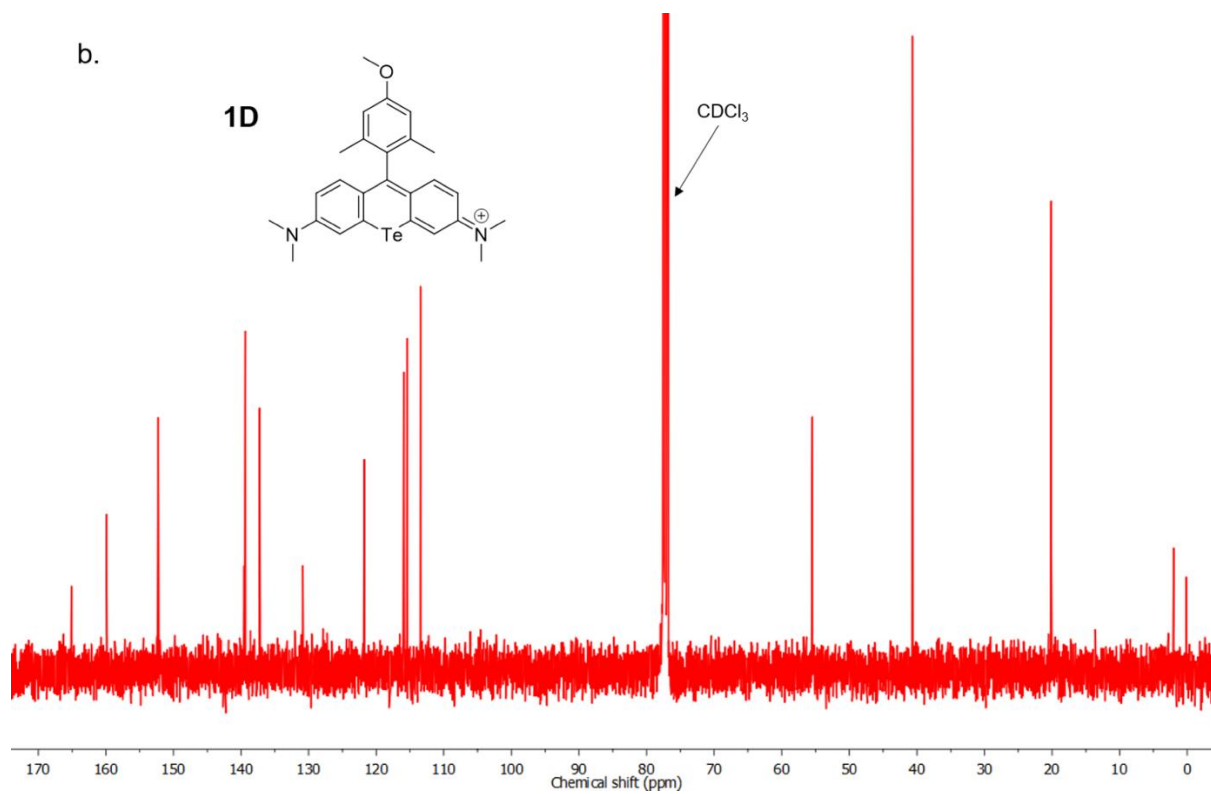

Figure S4. a.) <sup>1</sup>H NMR of **1D** in CDCl<sub>3</sub> and b.) <sup>13</sup>C NMR of **1D** in CDCl<sub>3</sub>. Residual solvent labeled according to Ref<sup>2</sup>.

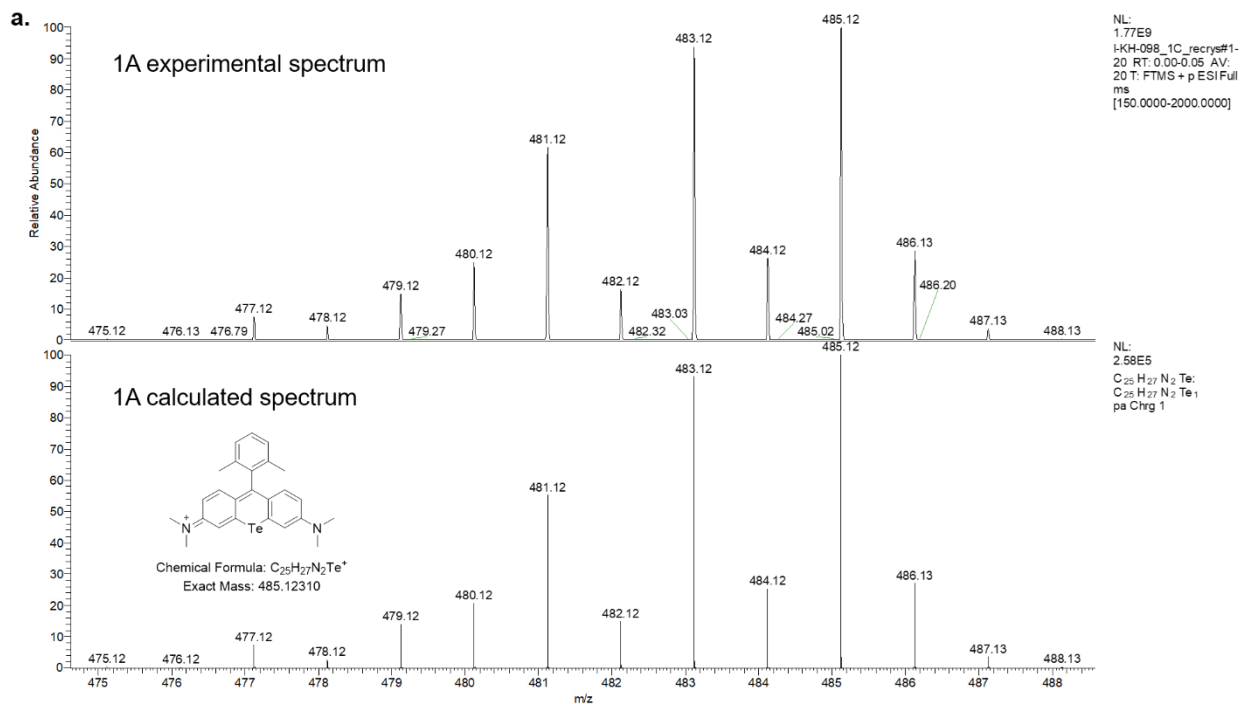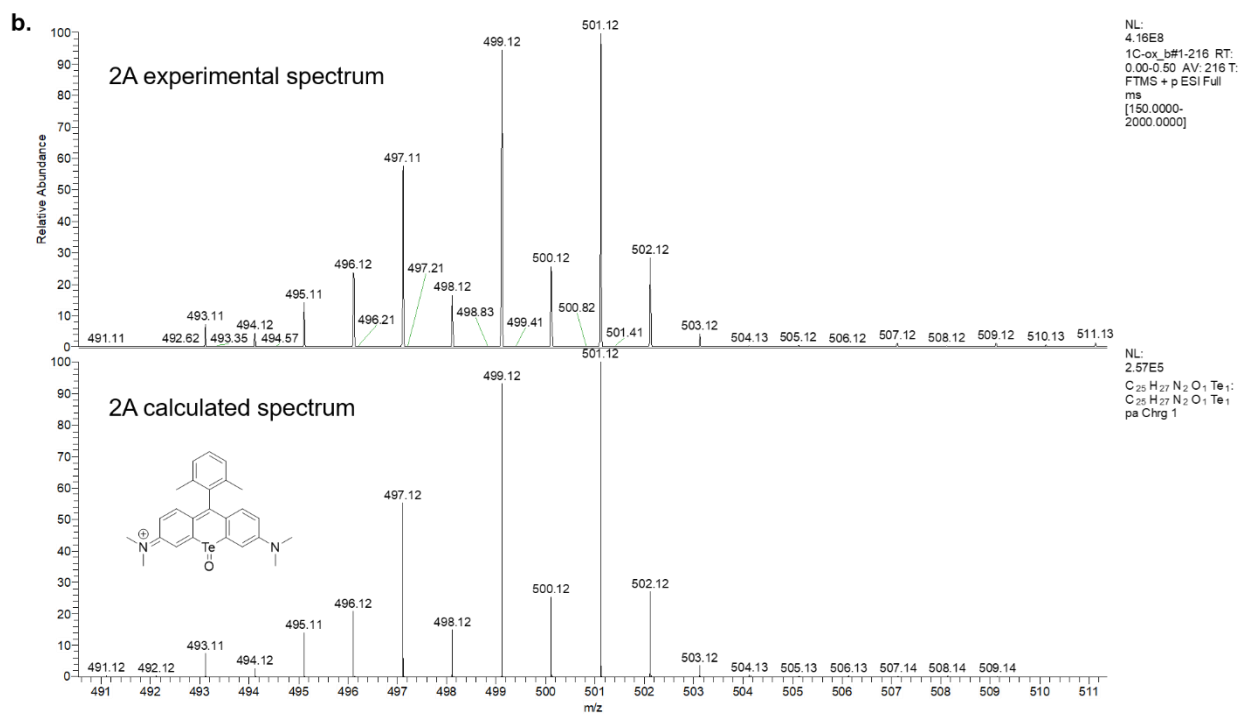

Figure S5. Experimental and calculated mass spectra of a.) **1A** and b.) **2A**.

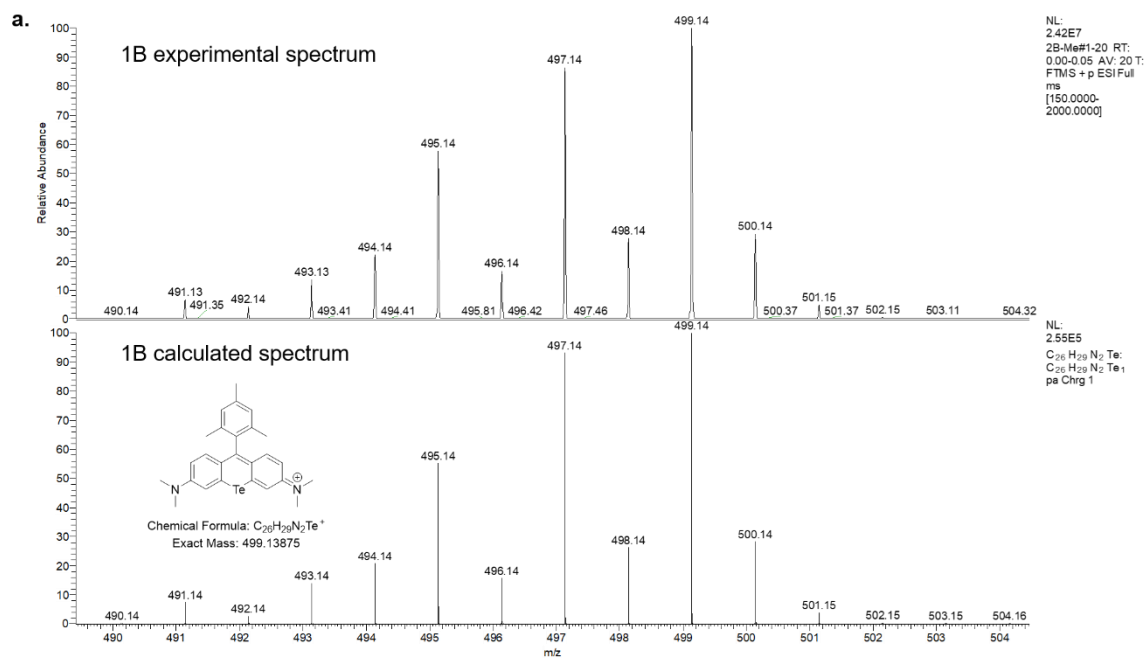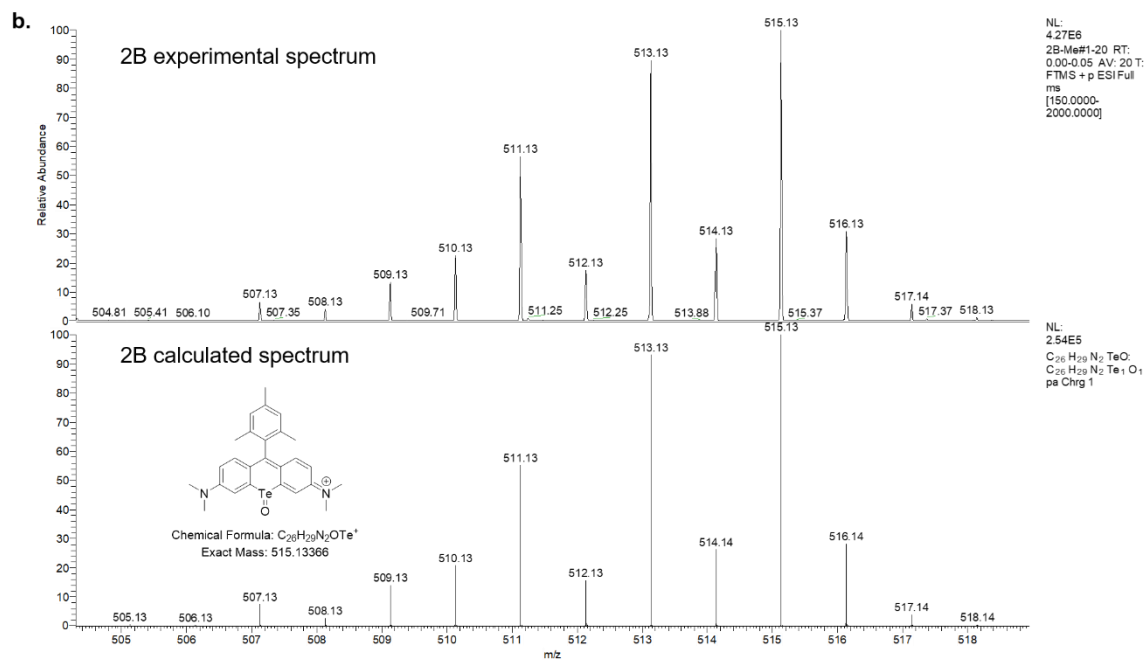

Figure S6. Experimental and calculated mass spectra of a.) **1B** and b.) **2B**.



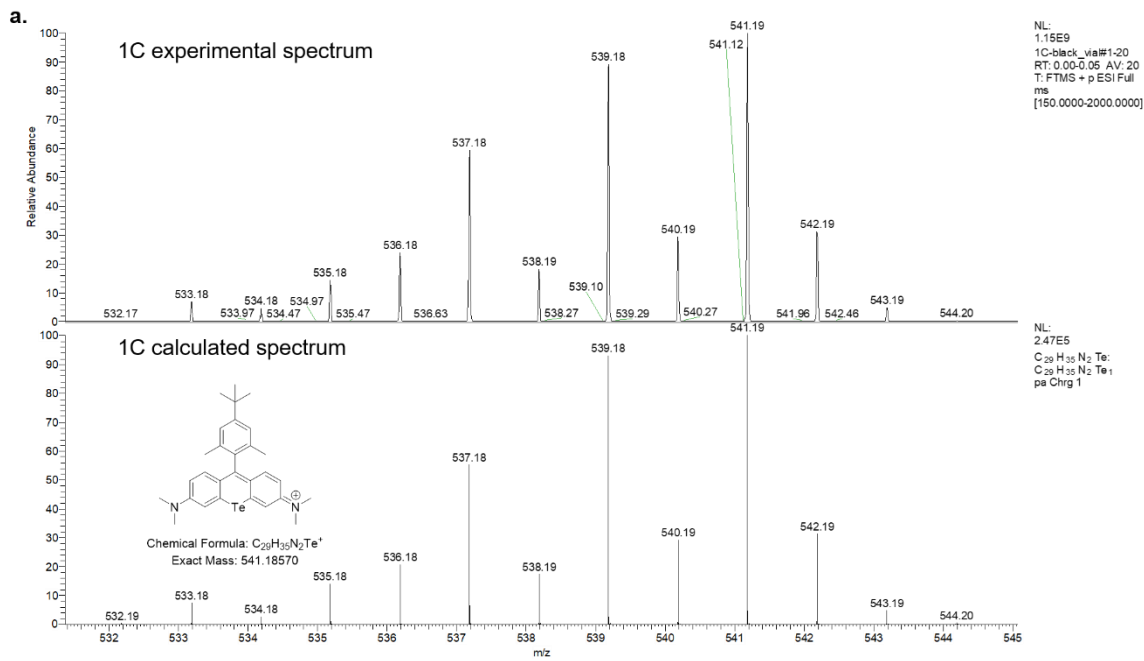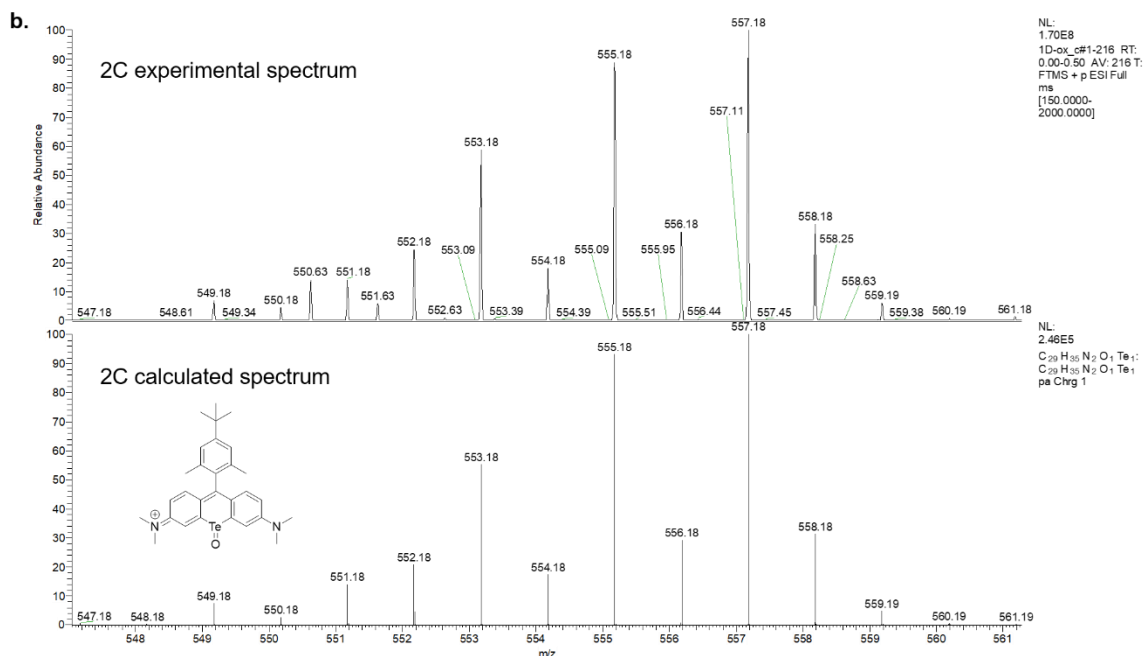

Figure S7. Experimental and calculated mass spectra of a.) **1C** and b.) **2C**.

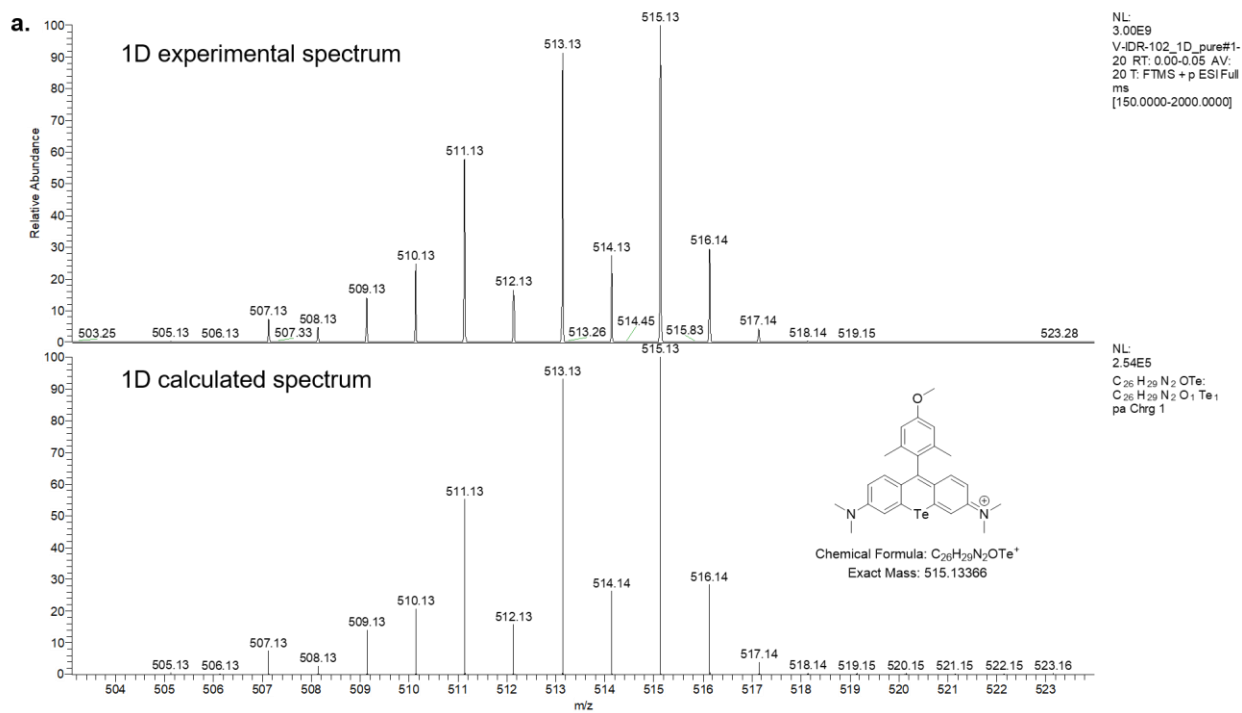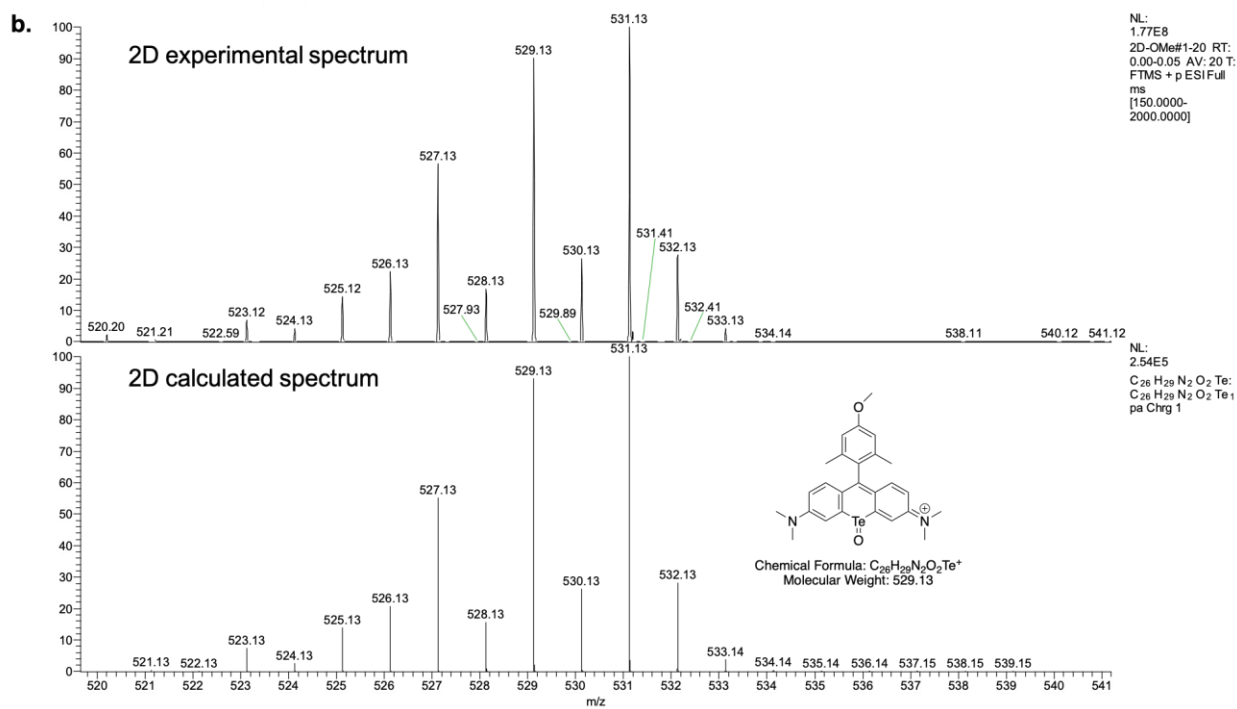

Figure S8. Experimental and calculated mass spectra of a.) **1D** and b.) **2D**.

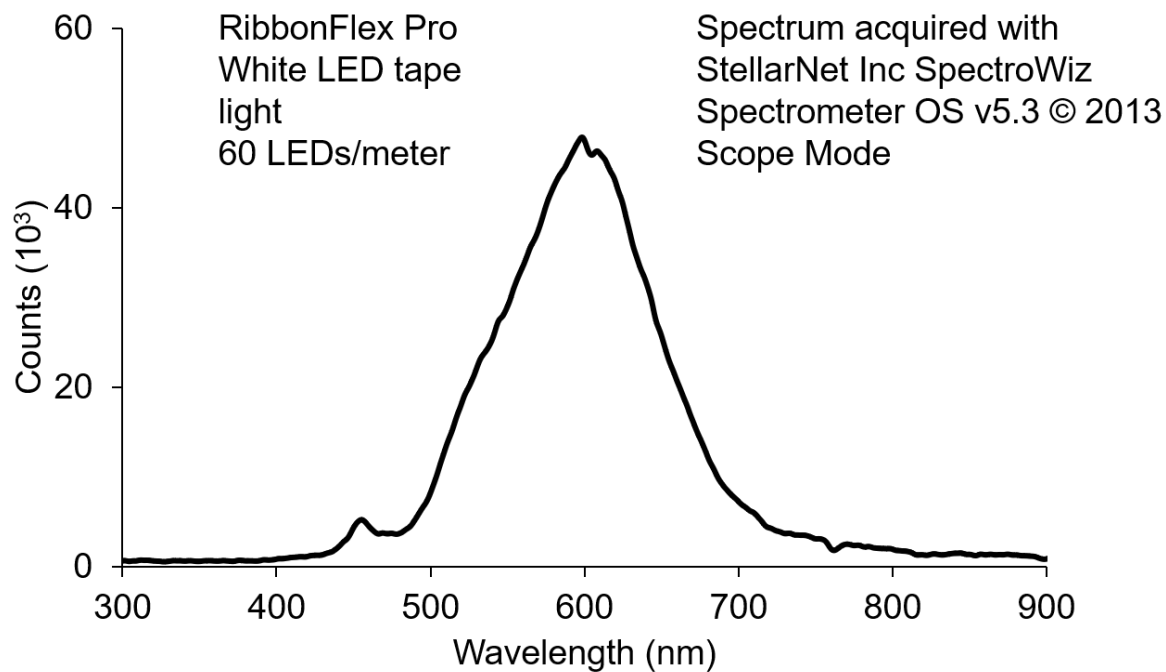

Figure S9. Spectrum of 24 W white LED tape.

Table S13. Hirshfeld charges of Te and O atoms of **1A-2D** and **2A-2D**, with experimental rates and  $\Delta G$ 's.

| Dye       | Te Charge <sub>cal</sub> | dye       | Hammett constant ( $\sigma_p$ ) | Te charge <sub>cal</sub> | O charge <sub>cal</sub> |
|-----------|--------------------------|-----------|---------------------------------|--------------------------|-------------------------|
| <b>1A</b> | 0.0831                   | <b>2A</b> | 0.00                            | 0.3218                   | -0.4494                 |
| <b>1B</b> | 0.0814                   | <b>2B</b> | -0.17                           | 0.3214                   | -0.4502                 |
| <b>1C</b> | 0.0817                   | <b>2C</b> | -0.20                           | 0.3207                   | -0.4498                 |
| <b>1D</b> | 0.0812                   | <b>2D</b> | -0.27                           | 0.3212                   | -0.4504                 |

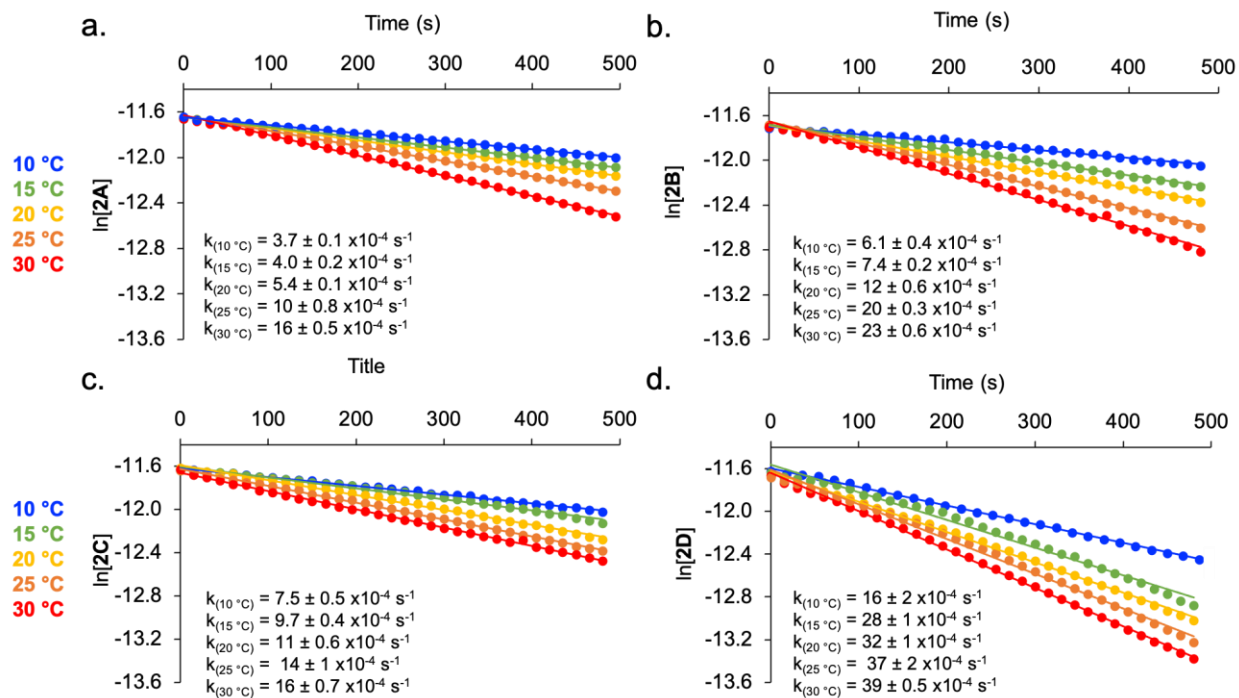

Figure S10. Pseudo-first order rates of reduction of **2A** (top left), **2B** (top right), **2C** (bottom left), and **2D** (bottom right) at a concentration of  $8.4 \times 10^{-6} \text{ M}$  with 100 eq methylphenyl silane in 1:1 MeOH/H<sub>2</sub>O. Rates were collected at 5 °C increments over a temperature range of 10-30 °C.

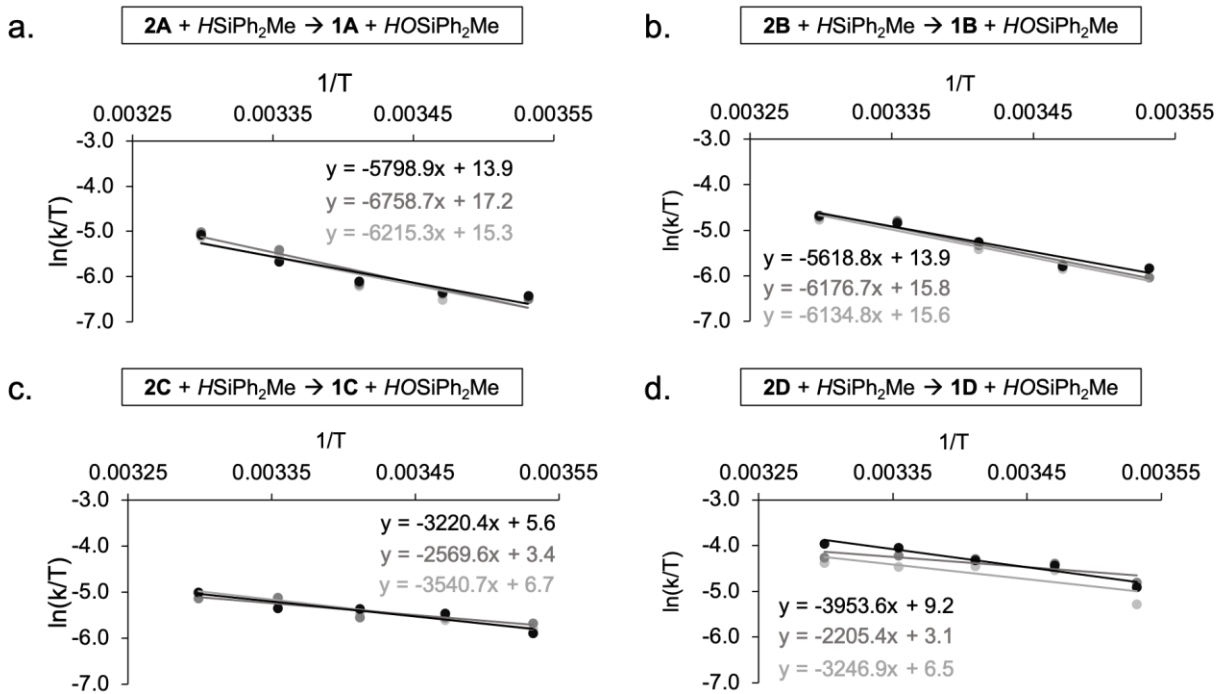

Figure S11. Triplicate Eyring plots of  $1/T$  vs.  $\ln(k/T)$  for **2A** (top left), **2B** (top right), **2C** (bottom left), and **2D** (bottom right) derived from pseudo-first order rates at 10, 15, 20, 25 and 30 °C used to calculate experimental values for  $\Delta H^\ddagger$ ,  $\Delta S^\ddagger$ , and  $\Delta G^\ddagger$ .

Table S14. Relative energy of optimized structures **1A-1D** and **2A-2D**. Energies were calculated in kcal/mol from Hartree (627.5 kcal·mol<sup>-1</sup> /H). The energy values were taken from the free energy corrected values obtained from frequency calculations.

|           | Functional group on xylene | Energy (Hartree) | Energy (kcal·mol <sup>-1</sup> ) |
|-----------|----------------------------|------------------|----------------------------------|
| <b>1A</b> | H                          | -1125.2218       | -706076.68                       |
| <b>2A</b> | H                          | -1200.3888       | -753243.97                       |
| <b>1B</b> | Me                         | -1125.2218       | -706076.68                       |
| <b>2B</b> | Me                         | -1200.3888       | -753243.97                       |
| <b>1C</b> | tBu                        | -1243.0779       | -780031.38                       |
| <b>2C</b> | tBu                        | -1318.2446       | -827198.49                       |
| <b>1D</b> | OMe                        | -1200.4265       | -753267.63                       |
| <b>2D</b> | OMe                        | -1275.5931       | -800434.67                       |
